# Supplementary material for: Efficient synthesis of N-(chloromethyl)nitramines via TiCl4-catalyzed chlorodeacetoxylation
Source: Royal Society of Chemistry journal article supplement (doi:10.1039/d2nj03521a), 2022-01-01

## Efficient Synthesis of *N*-(Chloromethyl)nitramines *via* TiCl<sub>4</sub>-Catalyzed Chloroacetoxylation

Pavel S. Gribov,<sup>a</sup> Kyrill Yu. Suponitsky<sup>b</sup> and Aleksei B. Sheremetev<sup>a\*</sup>

<sup>a</sup>*Zelinsky Institute of Organic Chemistry, Russian Academy of Sciences, Moscow, 119991, Russian Federation.*

<sup>b</sup>*Kurnakov Institute of General and Inorganic Chemistry, Russian Academy of Sciences, Moscow, 119991, Russian Federation.*

\**E-mail: sab@ioc.ac.ru*

### CONTENTS

|                   |    |
|-------------------|----|
| X-ray experiments | 2  |
| Spectral data     | 4  |
| References        | 10 |
| NMR spectra       | 11 |

## X-ray experiments

The investigation of compounds **1e** and **1q** were carried out using SMART APEX2 CCD diffractometer ( $\lambda(\text{Mo-K}\alpha)=0.71073 \text{ \AA}$ , graphite monochromator,  $\omega$ -scans) at 120K. Collected data were processed by the SAINT and SADABS programs incorporated into the APEX2 program package [1]. The structures were solved by the direct methods and refined by the full-matrix least-squares procedure against  $F^2$  in anisotropic approximation. The refinement was carried out with the SHELXTL program [2]. The CCDC numbers (2125221 for compounds **1e**, and 2125222 for **1q**) contain the supplementary crystallographic data for this paper. These data can be obtained free of charge via [www.ccdc.cam.ac.uk/data\\_request/cif](http://www.ccdc.cam.ac.uk/data_request/cif).

*Crystallographic data for compounds 1e:*  $\text{C}_4\text{H}_8\text{N}_4\text{O}_4\text{Cl}_2$  are monoclinic, space group  $P2_1/c$ :  $a = 5.8212(4)\text{\AA}$ ,  $b = 11.9073(9)\text{\AA}$ ,  $c = 7.3664(5)\text{\AA}$ ,  $\beta = 112.7940(10)^\circ$ ,  $V = 470.72(6)\text{\AA}^3$ ,  $Z = 2$ ,  $M = 247.04$ ,  $d_{\text{cryst}} = 1.743 \text{ g}\cdot\text{cm}^{-3}$ .  $wR2=0.0615$  calculated on  $F^2_{hkl}$  for all 1209 independent reflections with  $2\theta < 57.7^\circ$ , ( $GOF=1.066$ ,  $R=0.0248$  calculated on  $F_{hkl}$  for 1155 reflections with  $I > 2\sigma(I)$ ).

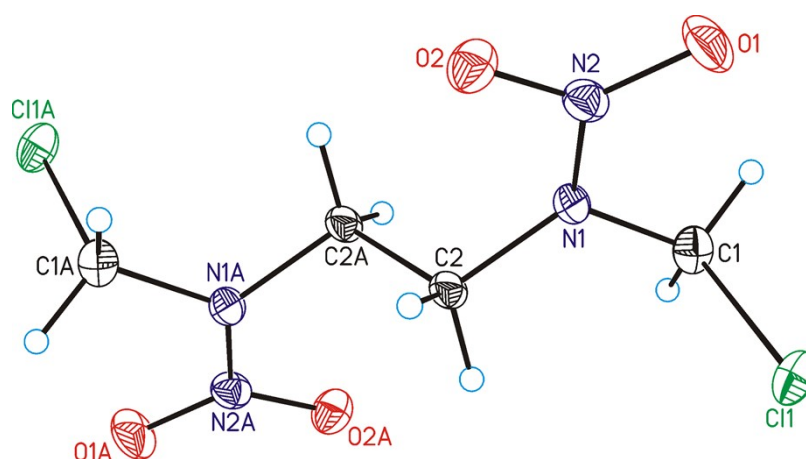

**Figure 1.** General view of compound **1e**. Thermal ellipsoids are drawn at 50% probability level.

**Crystallographic data for compounds 1q:**  $C_5H_{10}N_8O_8Cl_2$  are orthorhombic, space group  $Pbcn$ :  $a = 28.4221(9)\text{\AA}$ ,  $b = 5.9548(2)\text{\AA}$ ,  $c = 25.7279(9)\text{\AA}$ ,  $V = 4354.4(3)\text{\AA}^3$ ,  $Z = 12$ ,  $M = 381.11$ ,  $d_{\text{cryst}} = 1.744\text{ g}\cdot\text{cm}^{-3}$ .  $wR2=0.1029$  calculated on  $F^2_{hkl}$  for all 4304 independent reflections with  $2\theta < 52.2^\circ$ , ( $GOF=1.192$ ,  $R=0.0569$  calculated on  $F_{hkl}$  for 3615 reflections with  $I > 2\sigma(I)$ ).

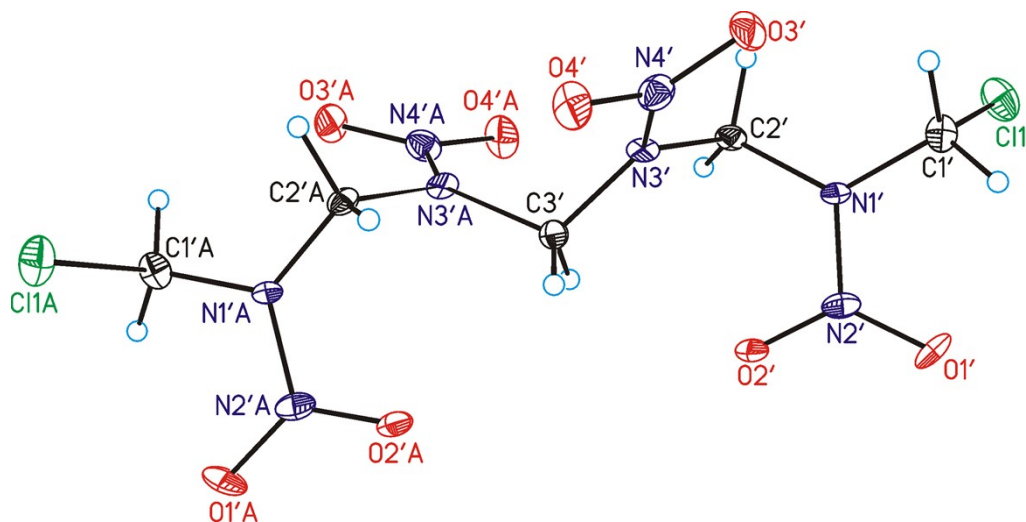

**Figure 2.** General view of compound **1q**. Thermal ellipsoids are drawn at 50% probability level.

## Spectral data

**1,7-Dichloro-2,4,6-trinitro-2,4,6-triazaheptane (1a):** colorless needles, mp 143-144 °C (from  $\text{CHCl}_3$ ) (lit.[3] mp 144-145°C),  $R_f = 0.45$ .  $^1\text{H}$  NMR ( $\text{CD}_3\text{CN}$ )  $\delta$  5.80 (s, 2H,  $\text{CH}_2$ ). IR and NMR data ( $^1\text{H}$ ,  $^{13}\text{C}$ ,  $^{14}\text{N}$ ) agree well with previously reported values [4]. Anal. Calcd. for  $\text{C}_4\text{H}_8\text{Cl}_2\text{N}_6\text{O}_6$  (307.04): C, 15.65; H, 2.63; N, 27.37. Found: C, 15.69; H, 2.66; N, 27.31.

**2-Nitro-2-azapropyl chloride (1b):** colorless liquid, bp 41-43°C /0.5 mm (lit.[4] bp 40-41°C/0.7 mm),  $R_f = 0.65$ .  $^1\text{H}$  NMR ( $\text{CDCl}_3$ )  $\delta$  3.42 (s, 3H,  $\text{CH}_3$ ),  $\delta$  5.64 (s, 2H,  $\text{CH}_2$ ). NMR data agree well with previously reported values [5]. Anal. Calcd. for  $\text{C}_2\text{H}_5\text{ClN}_2\text{O}_2$  (124.52): C, 19.29; H, 4.05; N, 22.50. Found: C, 19.33; H, 4.07; N, 22.44.

**1,3-Dichloro-2-nitro-2-azapropane (1c):** colorless liquid, bp 59-60 °C /0.5 mm, which crystallized on standing, mp 28-29 °C (lit.[3] bp 53-55°C /0.1 mm),  $R_f = 0.68$ .  $^1\text{H}$  NMR ( $\text{CDCl}_3$ )  $\delta$  5.66 (s, 2H,  $\text{CH}_2$ ). IR and NMR data ( $^1\text{H}$ ,  $^{13}\text{C}$ ,  $^{14}\text{N}$ ) agree well with previously reported values [3]. Anal. Calcd. for  $\text{C}_2\text{H}_4\text{Cl}_2\text{N}_2\text{O}_2$  (158.97): C, 15.11; H, 2.54; N, 17.62. Found: C, 15.07; H, 2.62; N, 17.79.

**1,5-Dichloro-2,4-dinitro-2,4-diazapentane (1d):** colorless needles, mp 91-94°C (from  $\text{CCl}_4$ , lit.[6] 89-90°C),  $R_f = 0.55$ .  $^1\text{H}$  NMR ( $\text{CDCl}_3$ )  $\delta$  5.62 (s, 2H,  $\text{CH}_2$ ), 5.81 (s, 2H,  $\text{CH}_2\text{Cl}$ ).  $^{13}\text{C}$  NMR ( $\text{CDCl}_3$ )  $\delta$  58.2, 63.4.  $^{14}\text{N}$  NMR ( $\text{CDCl}_3$ )  $\delta$  -37.9 ( $\text{NO}_2$ ). IR (KBr): 3067, 3023, 1583, 1551, 1443, 1282, 1270, 1241, 912  $\text{cm}^{-1}$ . Anal. Calcd. for  $\text{C}_3\text{H}_6\text{Cl}_2\text{N}_4\text{O}_4$  (233.01): C, 15.46; H, 2.60; N, 24.05. Found: C, 15.39; H, 2.61; N, 23.96.

**1,6-Dichloro-2,5-dinitro-2,5-diazapentane (1e):** colorless needles, mp 107-109°C (from CHCl<sub>3</sub>, lit. [6] mp 107-109°C),  $R_f = 0.62$ . <sup>1</sup>H NMR (DMSO-d<sub>6</sub>) δ 4.02 (s, 2H, CH<sub>2</sub>), 5.02 (s, 2H, CH<sub>2</sub>Cl). <sup>13</sup>C NMR (DMSO-d<sub>6</sub>) δ 46.9, 43.1. <sup>14</sup>N NMR (DMSO-d<sub>6</sub>) δ -29.9 (NO<sub>2</sub>). IR (KBr): 3598, 3456, 3412, 1550, 1454, 1424, 1343, 1264, 1160, 915, 669 cm<sup>-1</sup>. Anal. Calcd. for C<sub>3</sub>H<sub>6</sub>Cl<sub>2</sub>N<sub>4</sub>O<sub>4</sub> (247.03): C, 15.46; H, 2.60; N, 24.05. Found: C, 15.39; H, 2.61; N, 23.96.

**1-Chloro-2,4,6-trinitro-2,4,6-triazaheptane (1f):** colorless plates, mp 140-142°C (from CHCl<sub>3</sub>, lit. [7] mp 139.5-141°C),  $R_f = 0.5$ . <sup>1</sup>H NMR (CD<sub>3</sub>CN) δ 3.49 (s, 3H, CH<sub>3</sub>), 5.67 (s, 2H, CH<sub>2</sub>Cl), 5.80 (s, 2H, CH<sub>2</sub>), 5.83 (s, 2H, CH<sub>2</sub>). <sup>13</sup>C NMR (CD<sub>3</sub>CN) δ 40.8, 60.2, 65.4, 67.2. <sup>14</sup>N NMR (CD<sub>3</sub>CN) δ -35.7, -33.8, -29.5 (NO<sub>2</sub>). IR (KBr): 3090, 3033, 1575, 1521, 1450, 1307, 1281, 1256, 946, 765 cm<sup>-1</sup>. Anal. Calcd. for C<sub>4</sub>H<sub>9</sub>ClN<sub>6</sub>O<sub>6</sub> (296.19): C, 17.62; H, 3.33; N, 30.83. Found: C, 17.67; H, 3.34; N, 30.72.

**1-Chloro-2,4,6-trinitro-2,4,6-triazaoctane (1g):** colorless plates, mp 115-117°C (from CHCl<sub>3</sub>),  $R_f = 0.55$ . <sup>1</sup>H NMR (CD<sub>3</sub>CN) δ 1.27 (t, 3H,  $J = 14$  Hz, CH<sub>3</sub>), 4.0-3.93 (q, 1H,  $J = 20.8$  Hz, CH<sub>2</sub>), 5.68 (s, 2H, CH<sub>2</sub>Cl), 5.82 (s, 2H, CH<sub>2</sub>NCH<sub>2</sub>), 5.85 (s, 2H, NCH<sub>2</sub>N). <sup>13</sup>C NMR (CD<sub>3</sub>CN) δ 12.3, 49.3, 60.2, 65.4, 66.5, 118.3. <sup>14</sup>N NMR (CD<sub>3</sub>CN) δ -35.1, -33.3, -29.6 (NO<sub>2</sub>). IR (KBr): 3084, 3040, 2991, 1575, 1552, 1516, 1468, 1442, 1409, 1273, 1247, 1201, 1153, 1096, 1076, 1042, 934, 911 cm<sup>-1</sup>. Anal. Calcd. for C<sub>7</sub>H<sub>15</sub>ClN<sub>6</sub>O<sub>6</sub> (310.22): C, 20.95; H, 3.87; N, 28.32. Found: C, 21.07; H, 3.91; N, 28.21.

**1-Chloro-2,4,6-trinitro-2,4,6-triazanonane (1h):** colorless plates, mp 109-111°C (from CHCl<sub>3</sub>),  $R_f = 0.55$ . <sup>1</sup>H NMR (CD<sub>3</sub>CN) δ 0.96 (t, 3H,  $J = 14.9$  Hz, CH<sub>3</sub>), 1.81-

1.68 (m, 2H,  $\text{CH}_2\text{CH}_3$ ), 3.89 (t, 2H,  $J = 15.1$  Hz,  $\text{NCH}_2$ ), 5.71 (s, 2H,  $\text{CH}_2\text{Cl}$ ), 5.83 (s, 2H,  $\text{CH}_2\text{NCH}_2$ ), 5.86 (s, 2H,  $\text{NCH}_2\text{N}$ ).  $^{13}\text{C}$  NMR ( $\text{CD}_3\text{CN}$ )  $\delta$  10.3, 19.8, 54.5, 59.2, 64.5, 65.5.  $^{14}\text{N}$  NMR ( $\text{CD}_3\text{CN}$ )  $\delta$  -35.1, -33.4, -29.6 ( $\text{NO}_2$ ). IR (KBr): 3081, 3036, 2976, 2937, 2876, 1575, 1527, 1445, 1416, 1272, 1246, 1232, 1186, 1150, 1111, 1058, 940, 915  $\text{cm}^{-1}$ . Anal. Calcd. for  $\text{C}_7\text{H}_{15}\text{ClN}_6\text{O}_6$  (324.25): C, 23.97; H, 4.36; N, 27.95. Found: C, 24.01; H, 4.42; N, 27.87.

**1-Chloro-2,4,6-trinitro-2,4,6-triazadecane (1i):** colorless plates, mp 102-103°C (from  $\text{CCl}_4$ ),  $R_f = 0.55$ .  $^1\text{H}$  NMR ( $\text{CD}_3\text{CN}$ )  $\delta$  0.95 (t, 3H,  $J = 14.7$  Hz,  $\text{CH}_3$ ), 1.30-1.43 (m, 2H,  $\text{CH}_2$ ), 1.63-1.73 (m, 2H,  $\text{CH}_2$ ), 3.90 (t, 2H,  $J = 15.2$  Hz,  $\text{NCH}_2$ ), 5.69 (s, 2H,  $\text{CH}_2\text{Cl}$ ), 5.81 (s, 2H,  $\text{CH}_2\text{NCH}_2$ ), 5.84 (s, 2H,  $\text{NCH}_2\text{N}$ ).  $^{13}\text{C}$  NMR ( $\text{CD}_3\text{CN}$ )  $\delta$  13.9, 20.6, 29.5, 53.8, 60.2, 65.4, 66.5.  $^{14}\text{N}$  NMR ( $\text{CD}_3\text{CN}$ )  $\delta$  -35.0, -33.3, -29.6 ( $\text{NO}_2$ ). IR (KBr): 3086, 3035, 2963, 2933, 2875, 1572, 1523, 1435, 1413, 1273, 1243, 1149, 1100, 1056, 937, 906, 852, 764, 672, 644, 609  $\text{cm}^{-1}$ . Anal. Calcd. for  $\text{C}_7\text{H}_{15}\text{ClN}_6\text{O}_6$  (338.28): C, 26.72; H, 4.80; N, 26.71. Found: C, 26.75; H, 4.78; N, 26.77.

**1-Bromo-10-chloro-5,7,9-trinitro-5,7,9-triazadecane (1j):** colorless plates, mp 96-97.5°C (from  $\text{CCl}_4$ ),  $R_f = 0.62$ .  $^1\text{H}$  NMR ( $\text{CD}_3\text{CN}$ )  $\delta$  1.86-1.88 (m, 4H,  $2\text{CH}_2$ ), 3.51 (t, 2H,  $J = 12.2$  Hz,  $\text{CH}_2\text{Br}$ ), 3.94 (t, 2H,  $J = 13.7$  Hz,  $\text{NCH}_2$ ), 5.69 (s, 2H,  $\text{CH}_2\text{Cl}$ ), 5.82 (s, 2H,  $\text{CH}_2\text{NCH}_2$ ), 5.85 (s, 2H,  $\text{NCH}_2\text{N}$ ).  $^{13}\text{C}$  NMR ( $\text{CD}_3\text{CN}$ )  $\delta$  26.3, 30.6, 34.4, 53.1, 60.2, 65.5, 66.6.  $^{14}\text{N}$  NMR ( $\text{CD}_3\text{CN}$ )  $\delta$  -35.1, -33.4, -29.7 ( $\text{NO}_2$ ). IR (KBr): 3087, 3039, 2966, 1566, 1525, 1448, 1431, 1408, 1273, 1109, 1086, 1063, 1022, 931, 908  $\text{cm}^{-1}$ . Anal. Calcd. for  $\text{C}_7\text{H}_{15}\text{ClN}_6\text{O}_6$  (417.17): C, 21.36; H, 3.59; N, 21.35. Found: C, 21.43; H, 3.63; N, 21.27.

**1-Chloro-2,4,6-trinitro-2,4,6-triaza-9-methyldecane (1k):** colorless plates, mp 114-116°C (from CCl<sub>4</sub>),  $R_f = 0.55$ . <sup>1</sup>H NMR (CD<sub>3</sub>CN)  $\delta$  0.97 (t, 3H,  $J = 6.2$  Hz, CH<sub>3</sub>), 1.70-1.57 (m, 3H, CHCH<sub>2</sub>), 3.94 (t, 2H,  $J = 15.2$  Hz, NCH<sub>2</sub>), 5.71 (s, 2H, CH<sub>2</sub>Cl), 5.83 (s, 2H, CH<sub>2</sub>NCH<sub>2</sub>), 5.86 (s, 2H, NCH<sub>2</sub>N). <sup>13</sup>C NMR (CD<sub>3</sub>CN)  $\delta$  21.6, 25.8, 34.9, 51.6, 59.2, 64.5, 65.5. <sup>14</sup>N NMR (CD<sub>3</sub>CN)  $\delta$  -35.1, -33.4, -29.7 (NO<sub>2</sub>). IR (KBr): 3081, 3046, 2961, 2932, 2875, 1590, 1523, 1449, 1415, 1272, 1185, 1157, 1100, 1078, 942, 914 cm<sup>-1</sup>. Anal. Calcd. for C<sub>7</sub>H<sub>15</sub>ClN<sub>6</sub>O<sub>6</sub> (352.30): C, 29.23; H, 5.21; N, 25.57. Found: C, 29.34; H, 5.16; N, 25.43.

**1-Chloro-2,5,7-trinitro-2,5,7-triazaoctane (1l):** colorless plates, mp 116-119°C (from CCl<sub>4</sub>),  $R_f = 0.42$ . <sup>1</sup>H NMR (CD<sub>3</sub>CN)  $\delta$  3.48 (s, 3H, CH<sub>3</sub>), 4.12 (t, 2H,  $J = 11.3$  Hz, CH<sub>2</sub>), 4.25 (t, 2H,  $J = 11.5$  Hz, CH<sub>2</sub>), 5.50 (s, 2H, CH<sub>2</sub>Cl), 5.66 (s, 2H, CH<sub>2</sub>). <sup>13</sup>C NMR (CD<sub>3</sub>CN)  $\delta$  40.6, 49.6, 51.0, 61.2, 68.4. <sup>14</sup>N NMR (CD<sub>3</sub>CN)  $\delta$  -32.6, -29.8, -28.7 (NO<sub>2</sub>). IR (KBr): 3067, 3010, 1553, 1533, 1459, 1321, 1293, 1264, 1069, 968, 946, 905, 764, 676 cm<sup>-1</sup>. Anal. Calcd. for C<sub>5</sub>H<sub>11</sub>ClN<sub>6</sub>O<sub>6</sub> (310.22): C, 20.95; H, 3.87; N, 29.32. Found: C, 21.04; H, 3.82; N, 29.25.

**1-Chloro-2,5,7-trinitro-2,5,7-triazanonane (1m):** colorless plates, mp 87-89.5°C (from CCl<sub>4</sub>),  $R_f = 0.45$ . <sup>1</sup>H NMR (CD<sub>3</sub>CN)  $\delta$  1.23 (t, 3H,  $J = 14$  Hz, CH<sub>3</sub>), 3.93 (q, 2H,  $J = 20.9$  Hz, CH<sub>2</sub>), 4.12 (t, 2H,  $J = 11.3$  Hz, CH<sub>2</sub>), 4.25 (t, 2H,  $J = 11.4$  Hz, CH<sub>2</sub>), 5.49 (s, 2H, CH<sub>2</sub>Cl), 5.66 (s, 2H, CH<sub>2</sub>). <sup>13</sup>C NMR (CD<sub>3</sub>CN)  $\delta$  12.2, 49.0, 49.5, 50.9, 61.1, 67.6. <sup>14</sup>N NMR (CD<sub>3</sub>CN)  $\delta$  -32.6, -29.8 (NO<sub>2</sub>). IR (KBr): 3081, 3019, 2978, 2938, 1551, 1510, 1456, 1286, 1246, 1065, 1034, 762 cm<sup>-1</sup>. Anal. Calcd. for C<sub>6</sub>H<sub>13</sub>ClN<sub>6</sub>O<sub>6</sub> (324.25): C, 23.97; H, 4.36; N, 27.95. Found: C, 24.10; H, 4.33; N, 28.28.

**1-Chloro-7-cyclohexyl-2,5,7-trinitro-2,5,7-triazaheptane (1n):** colorless plates, mp 100-102°C (from CCl<sub>4</sub>),  $R_f = 0.5$ . <sup>1</sup>H NMR (CD<sub>3</sub>CN)  $\delta$  1.26-1.18 (m, 1H), 1.41-1.35 (m, 2H), 1.66 (d, 1H,  $J = 13.3$  Hz), 1.81-1.74 (m, 2H), 1.86 (m, 4H), 4.13 (t, 2H,  $J = 11.5$  Hz, NCH<sub>2</sub>CH<sub>2</sub>), 4.21 (t, 1H,  $J = 9.6$  Hz, NCH), 4.24 (t, 2H,  $J = 11.6$  Hz, NCH<sub>2</sub>CH<sub>2</sub>), 5.53 (s, 2H, CH<sub>2</sub>Cl), 5.67 (s, 2H, CH<sub>2</sub>). <sup>13</sup>C NMR (CD<sub>3</sub>CN)  $\delta$  25.9, 26.5, 29.8, 49.5, 50.6, 61.1, 64.3, 65.3. <sup>14</sup>N NMR (CD<sub>3</sub>CN)  $\delta$  -32.5, -29.8 (NO<sub>2</sub>). IR (KBr): 2947, 2859, 1565, 1534, 1456, 1421, 1334, 1275, 1151, 1129, 1058, 1001, 759, 661, 607 cm<sup>-1</sup>. Anal. Calcd. for C<sub>10</sub>H<sub>19</sub>ClN<sub>6</sub>O<sub>6</sub> (378.34): C, 33.86; H, 5.40; N, 23.69. Found: C, 33.79; H, 5.45; N, 23.63.

**1-Bromo-9-chloro-3,5,8-trinitro-2,5,8-triazanonane (1o):** colorless plates, mp 100-102°C (from CCl<sub>4</sub>),  $R_f = 0.43$ . <sup>1</sup>H NMR (CD<sub>3</sub>CN)  $\delta$  3.68 (t, 2H,  $J = 13.3$  Hz, NCH<sub>2</sub>CH<sub>2</sub>Br), 4.14 (t, 2H,  $J = 11.5$  Hz, NCH<sub>2</sub>CH<sub>2</sub>Br), 4.26-4.33 (q, 4H, NCH<sub>2</sub>CH<sub>2</sub>N), 5.58 (s, 2H, CH<sub>2</sub>Cl), 5.68 (s, 2H, CH<sub>2</sub>). <sup>13</sup>C NMR (CD<sub>3</sub>CN)  $\delta$  27.5, 48.5, 55.1, 53.7, 60.2, 67.1. <sup>14</sup>N NMR (CD<sub>3</sub>CN)  $\delta$  -32.5, -30.2 (NO<sub>2</sub>). IR (KBr): 3075, 3023, 2955, 1547, 1513, 1458, 1446, 1413, 1334, 1291, 1276, 1248, 1218, 1195, 1155, 1124, 1084, 1064, 1032, 999, 951, 916, 877, 819, 759 cm<sup>-1</sup>. Anal. Calcd. for C<sub>6</sub>H<sub>12</sub>BrClN<sub>6</sub>O<sub>6</sub> (403.14): C, 18.99; H, 3.19; N, 22.14. Found: C, 19.07; H, 3.23; N, 22.03.

**1-Bromo-9-chloro-3,6,8,11-tetranitro-3,6,8,11-tetrazaundecane (1p):** colorless plates, mp 163-165°C (from C<sub>2</sub>H<sub>4</sub>Cl<sub>2</sub>),  $R_f = 0.45$ . <sup>1</sup>H NMR (CD<sub>3</sub>CN)  $\delta$  3.68 (t, 2H,  $J = 12.7$  Hz, CH<sub>2</sub>Br), 4.11-4.17 (q, 4H, CH<sub>2</sub>NCH<sub>2</sub>), 4.26 (t, 2H,  $J = 11.7$  Hz, CH<sub>2</sub>CH<sub>2</sub>N), 5.70 (s, 2H, CH<sub>2</sub>Cl), 5.82 (s, 2H, CH<sub>2</sub>NCH<sub>2</sub>), 5.85 (s, 2H, NCH<sub>2</sub>N). <sup>13</sup>C NMR (CD<sub>3</sub>CN)  $\delta$  27.7, 49.9, 50.0, 53.8, 59.2, 64.4, 66.3. <sup>14</sup>N NMR (CD<sub>3</sub>CN)  $\delta$  -35.1, -33.5, -29.1 (NO<sub>2</sub>). IR (KBr): 3085, 3029, 1574, 1534, 1457, 1443, 1418, 1330, 1271, 1248, 1236, 1218, 1133, 1112, 1070, 917, 764, 667, 640, 607 cm<sup>-1</sup>.



Anal. Calcd. for  $C_7H_{14}BrClN_8O_8$  (453.59): C, 18.54; H, 3.11; N, 24.70. Found: C, 18.62; H, 3.20; N, 24.57.

**1,9-Dichloro-2,4,6,8-tetrahydro-2,4,6,8-tetraazanonane (1q):** colorless plates, mp 183-186°C (from  $C_2H_4Cl_2$ ) (lit. [7] mp 195-198°C),  $R_f = 0.4$ .  $^1H$  NMR ( $CD_3CN$ )  $\delta$  5.82 (s, 2H,  $CH_2Cl$ ), 5.83 (s, 2H,  $NCH_2$ ), 5.88 (s, 2H,  $NCH_2N$ ).  $^{13}C$  NMR ( $CD_3CN$ )  $\delta$  60.2, 65.5, 65.9.  $^{14}N$  NMR ( $CD_3CN$ )  $\delta$  -33.4 ( $NO_2$ ). IR (KBr): 3069, 1586, 1565, 1443, 1370, 938, 912  $cm^{-1}$ . Anal. Calcd. For  $C_5H_{10}Cl_2N_8O_8$  (381.08): C, 15.76; H, 2.65; N, 29.40. Found: C, 15.84; H, 2.69; N, 29.34.

**1,8-Dichloro-2,7-dinitro-2,7-diazaoctane (1r):** colorless needles, mp 91-94°C (from  $CCl_4$ ) (lit. [8] mp 82-83°C),  $R_f = 0.57$ .  $^1H$  NMR ( $CDCl_3$ )  $\delta$  1.88 (m, 2H,  $CH_2CH_2$ ), 3.87 (s, 2H,  $CH_2N$ ), 5.63 (s, 2H,  $CH_2Cl$ ).  $^{13}C$  NMR ( $CDCl_3$ )  $\delta$  24.5, 50.3, 58.9.  $^{14}N$  NMR ( $CDCl_3$ )  $\delta$  -34.1 ( $NO_2$ ). IR (KBr): 3059, 3003, 2966, 2955, 2933, 2864, 1535, 1452, 1298, 1268, 1154, 1058, 920, 908, 629  $cm^{-1}$ . Anal. Calcd. for  $C_6H_{12}Cl_2N_4O_4$  (275.09): C, 26.20; H, 4.40; N, 20.37. Found: C, 26.26; H, 4.42; N, 20.28.

## References

1. *APEX2* and *SAINT*. Bruker AXS Inc., Madison, Wisconsin, USA, **2014**
2. G. M. Sheldrick, *Acta Crystallogr.*, **2015**, *C71*, 3-8.
3. T. M. Klapötke, B. Krumm, F. X. Steemann, *Propellants Explos. Pyrotech.*, **2009**, *34*, 13–23 **DOI**: 10.1002/prop.200700261
4. E. T. Apasov, A. V. Kalinin, S. L. Ioffe, V. A. Tartakovskii, *Russ. Chem. Bull.*, **1993**, *42*, 1262–1263 [Translation of *Izv. Akad. Nauk SSSR, Ser. Khim.*, **1993**, 1319 – 1320] **DOI**: 10.1007/BF00702022]
5. N. Fischer, K. Karaghiosoff, T. M. Klapoetke, J. Stierstorfer. *Z. Anorg. Allgem. Chem.*, **2010**, *636*, 735 – 749 **DOI**: 10.1002/zaac.200900521.
6. J. Majer, J. Denkstein. *Coll. Czech. Chem. Commun.* **1966**, *31*, 2547 – 2557 **DOI**: 10.1135/cccc19662547
7. D. M. Cason-Smith, *Pat US* 5243075, **1993**.
8. A.L. Fridman, L. O. Kon'shina, S. A. Petukhov. *J. Org. Chem. USSR*, **1975**, *11*, 1176 - 1179 [Translation of *Zh. Org. Khim.*, **1975**, *11*, 1187 – 1190].

## NMR spectra

 $^1\text{H}$  NMR  $\text{CD}_3\text{CN}$ 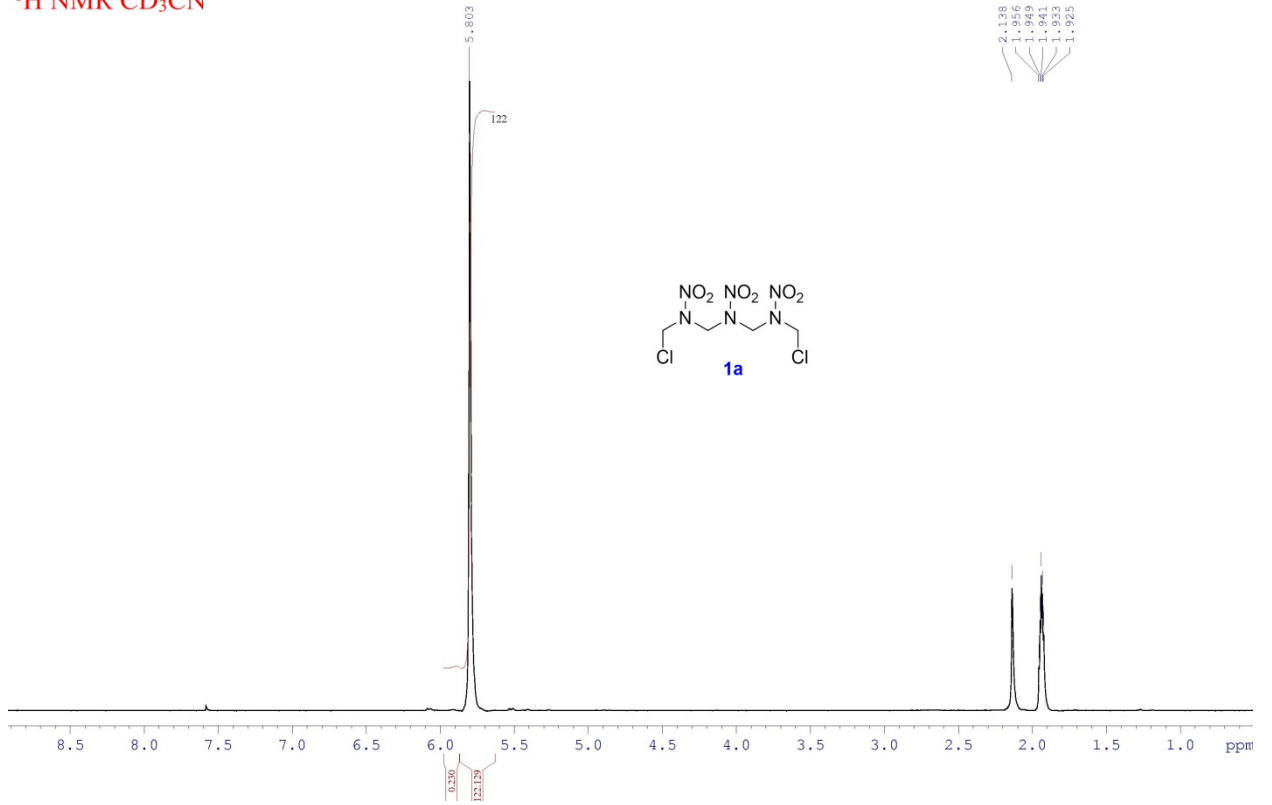 $^1\text{H}$  NMR  $\text{CDCl}_3$ 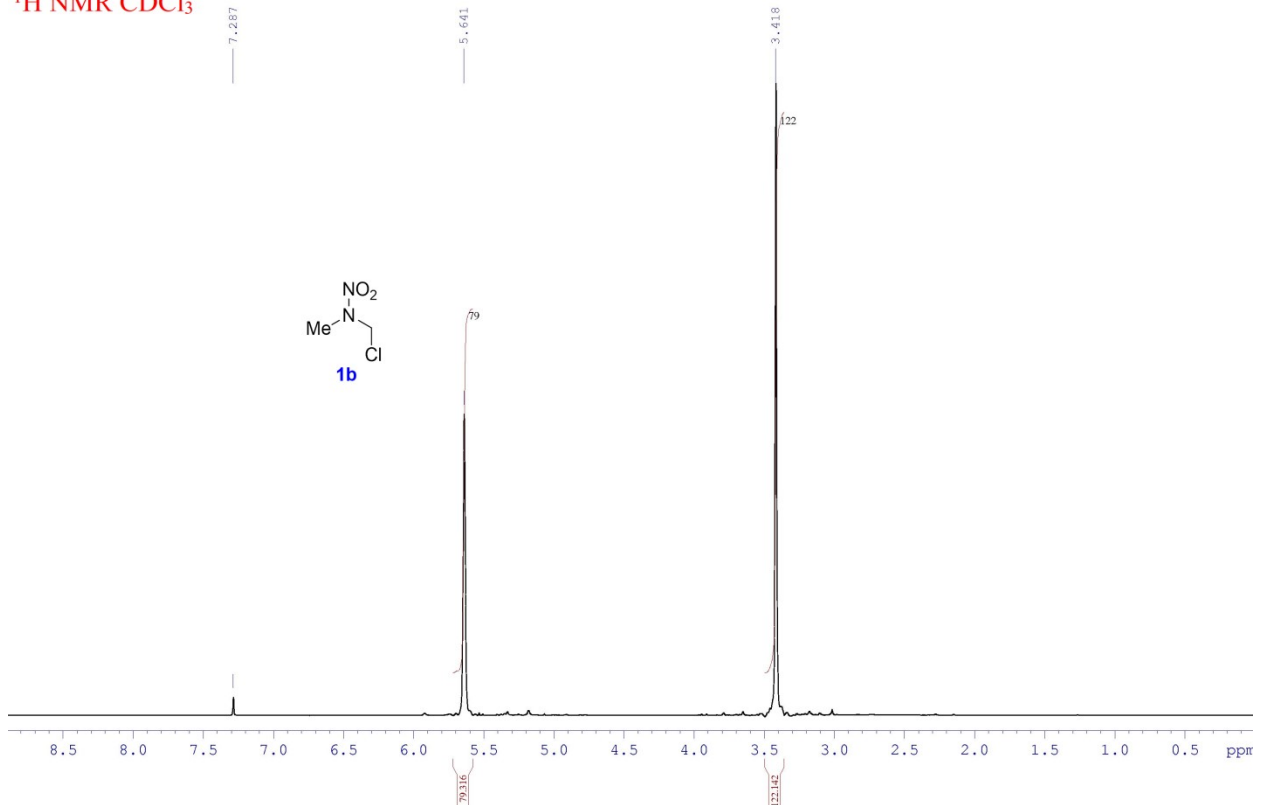

<sup>1</sup>H NMR CDCl<sub>3</sub>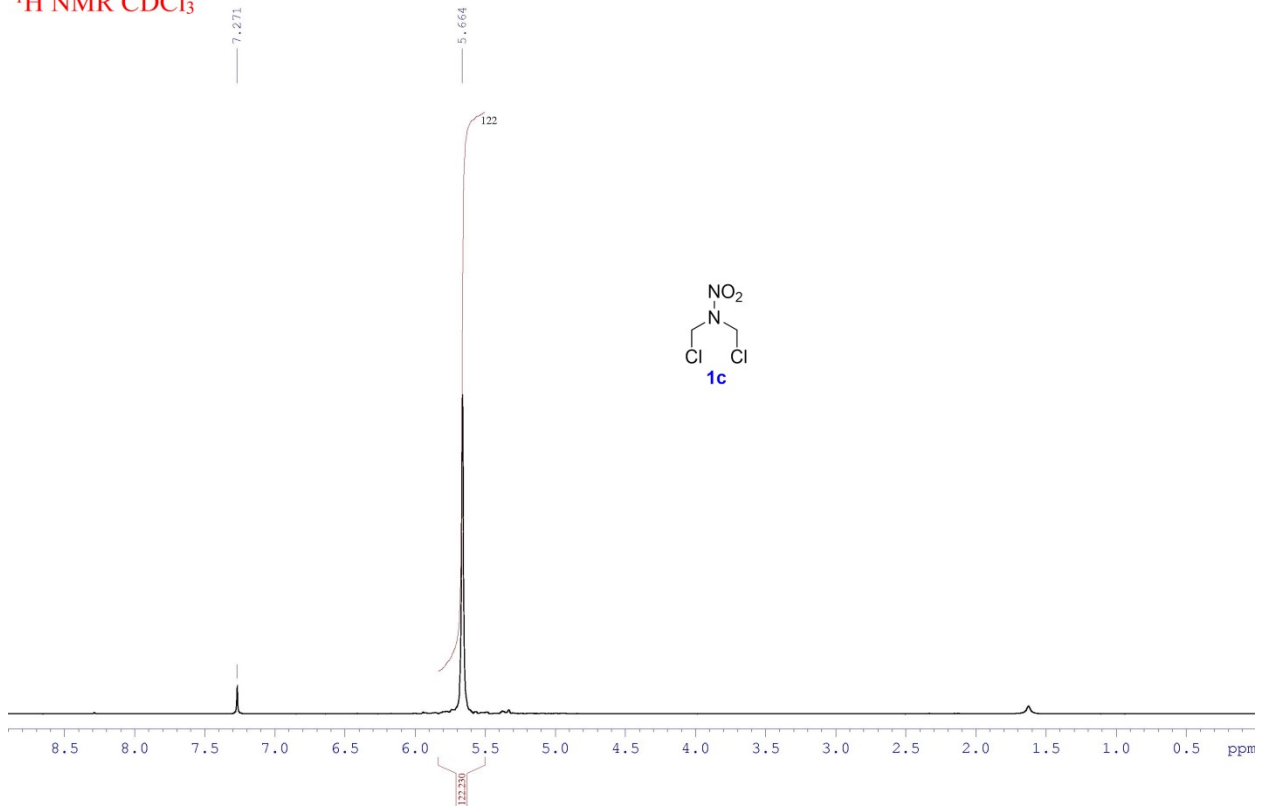<sup>1</sup>H NMR CDCl<sub>3</sub>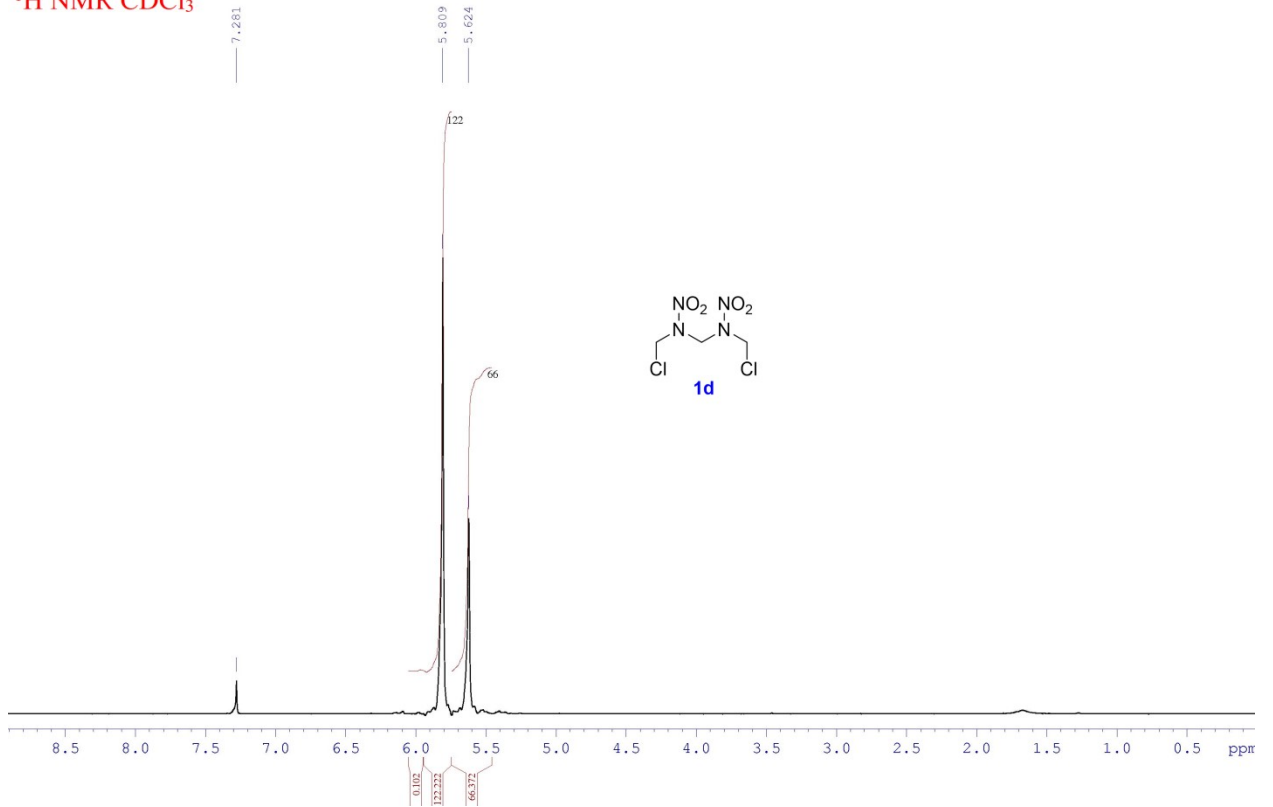

$^{13}\text{C}$  NMR  $\text{CDCl}_3$ 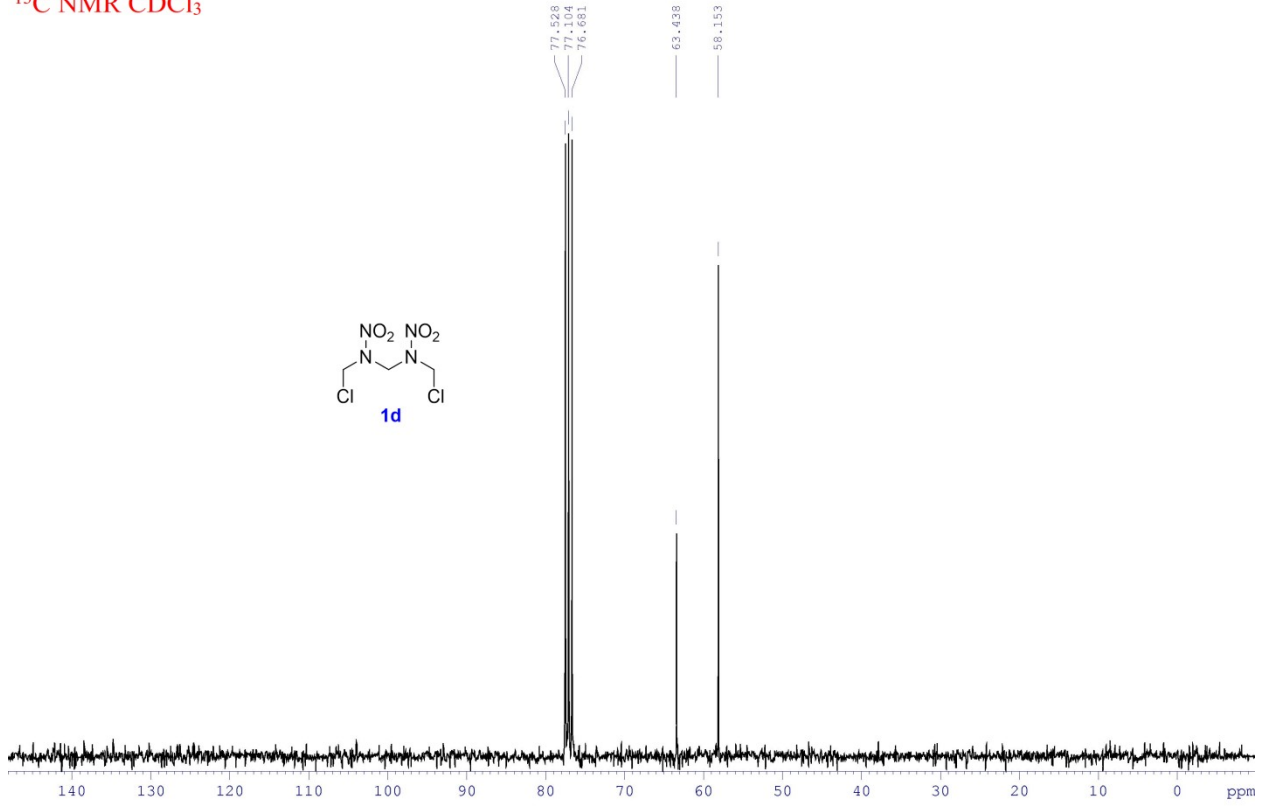 $^{14}\text{N}$  NMR  $\text{CDCl}_3$ 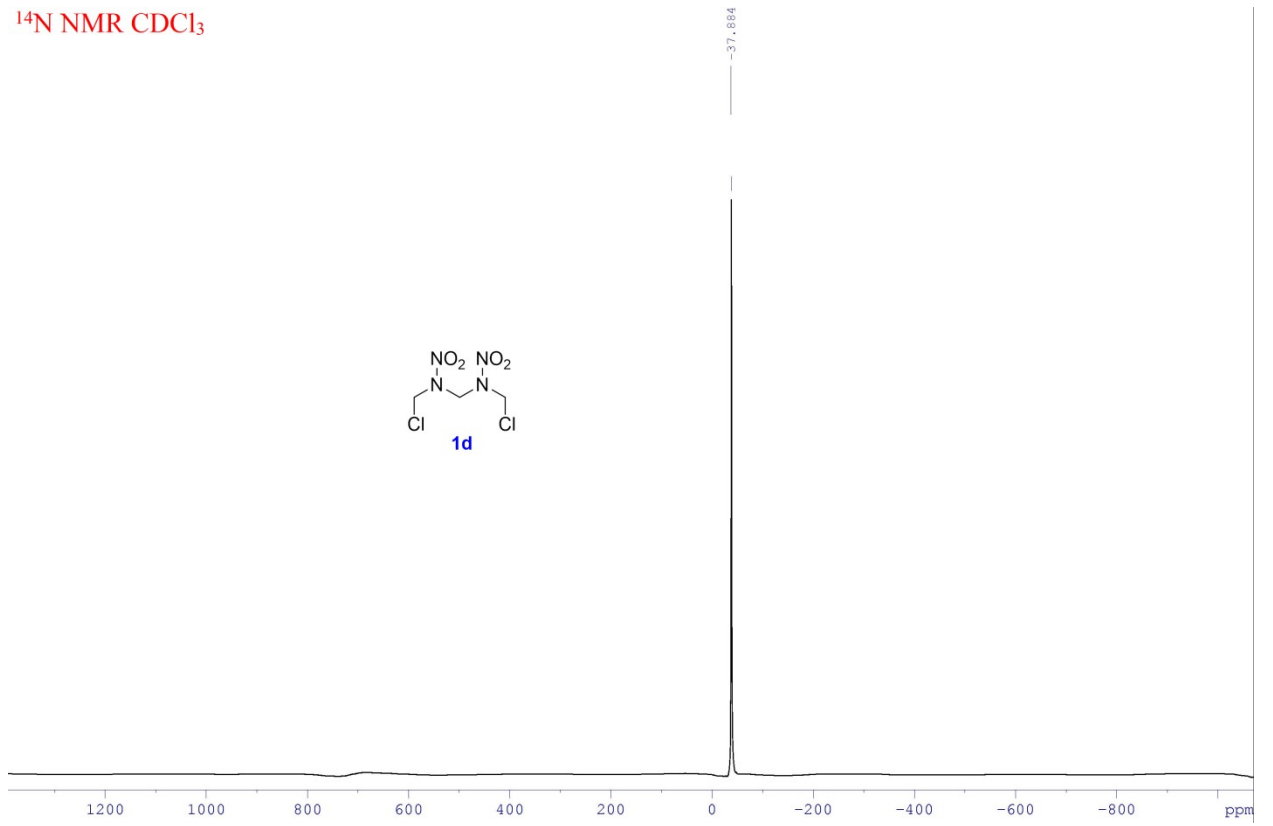

$^1\text{H}$  NMR DMSO- $d_6$ 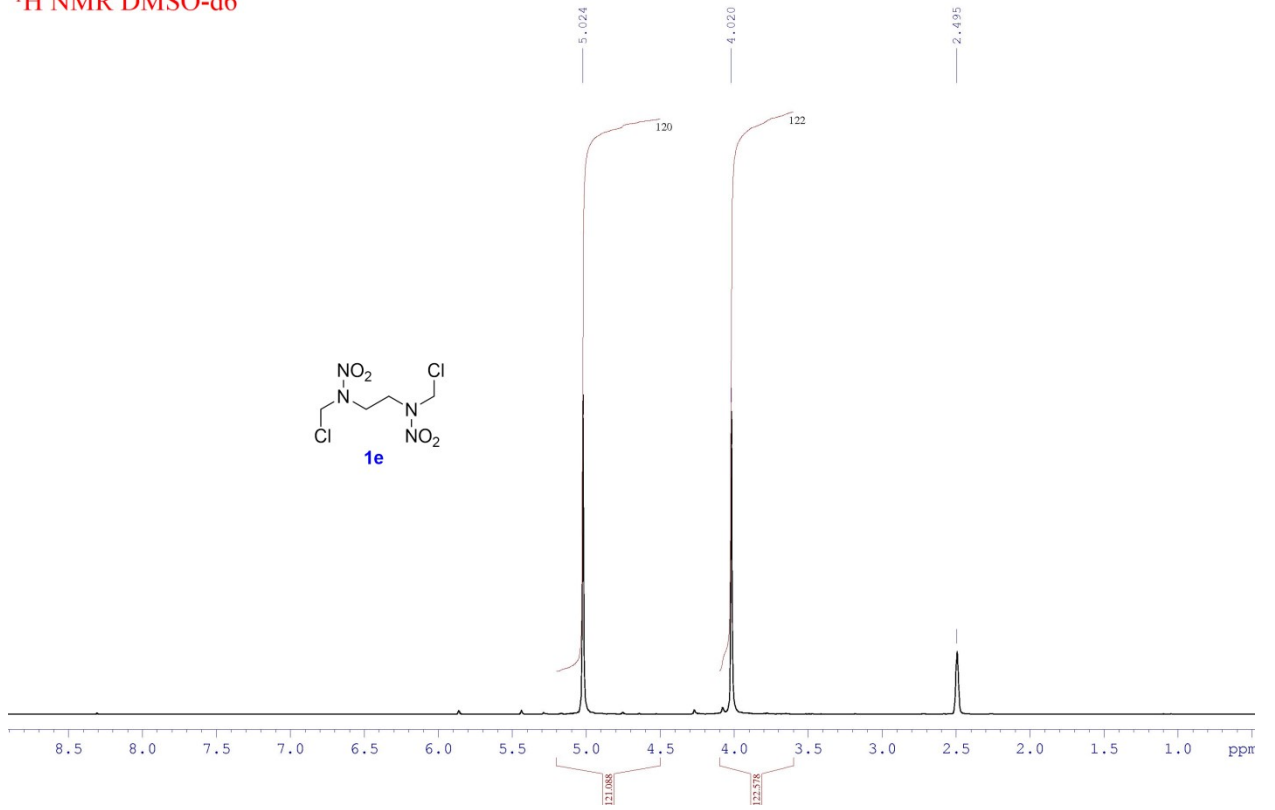 $^{13}\text{C}$  NMR  $\text{CDCl}_3$ 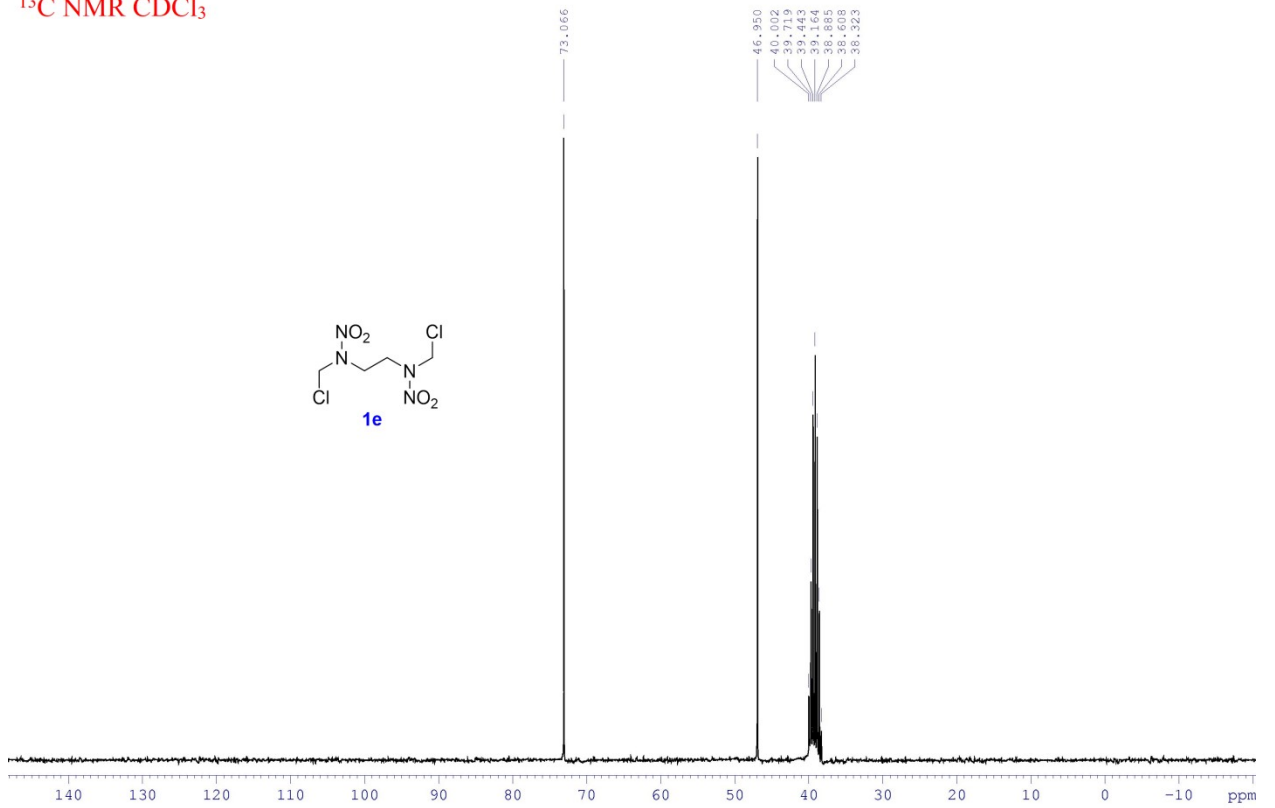

$^{14}\text{N}$  NMR DMSO- $d_6$ 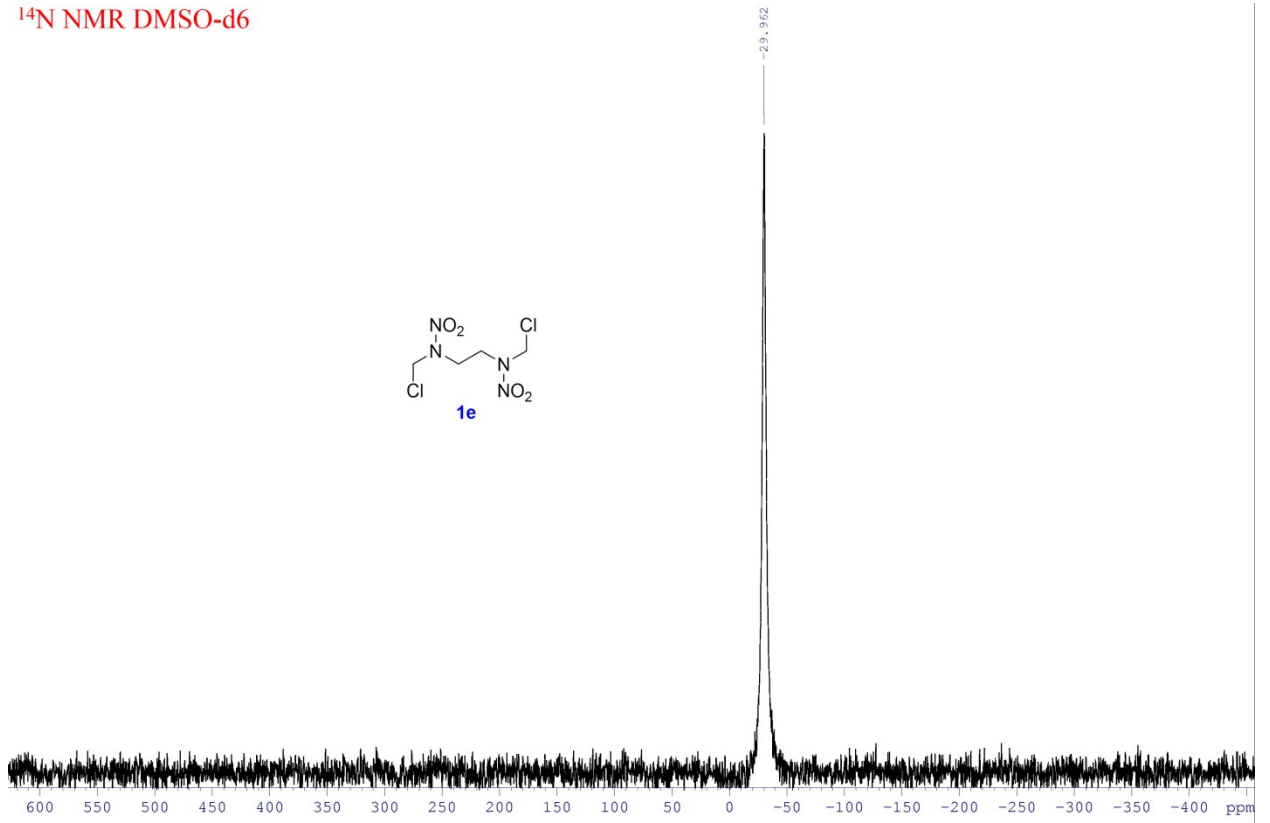 $^1\text{H}$  NMR  $\text{CD}_3\text{CN}$ 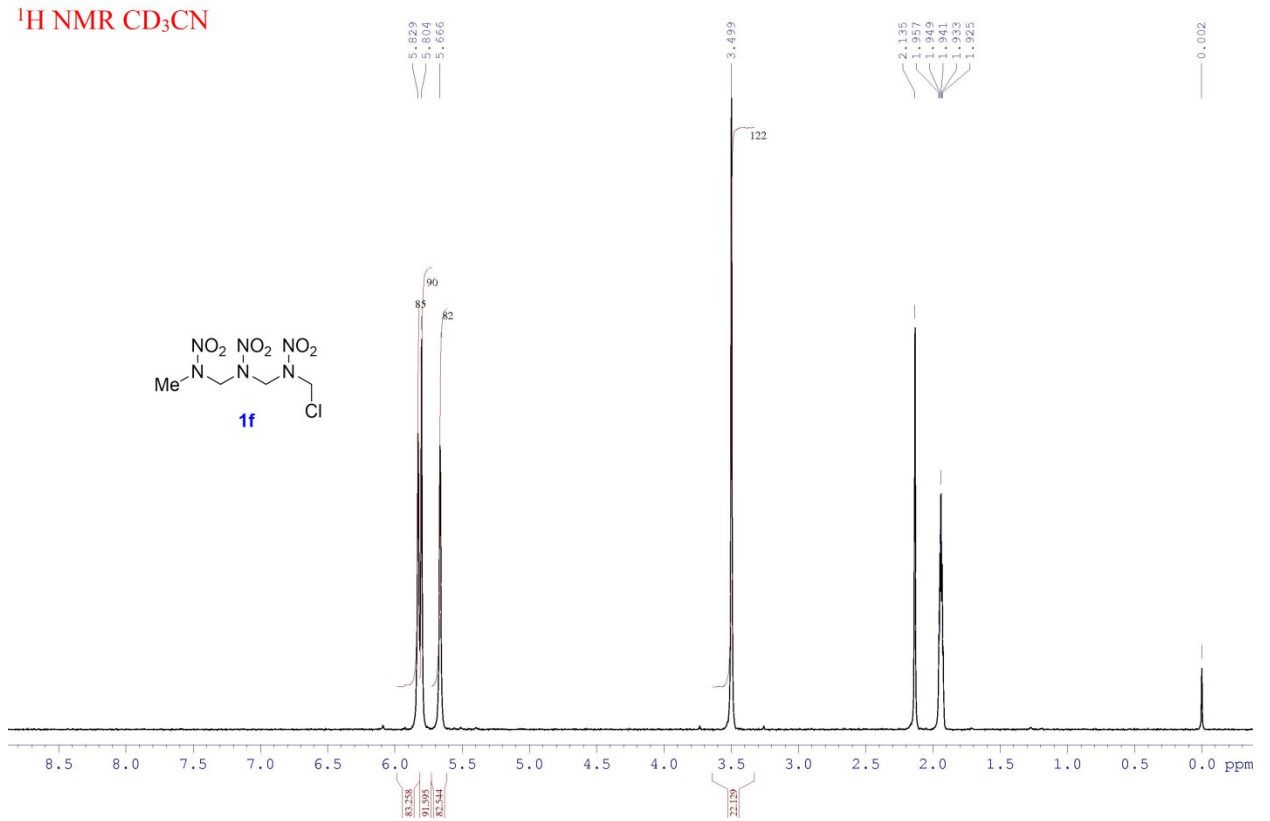

<sup>13</sup>C NMR CD<sub>3</sub>CN

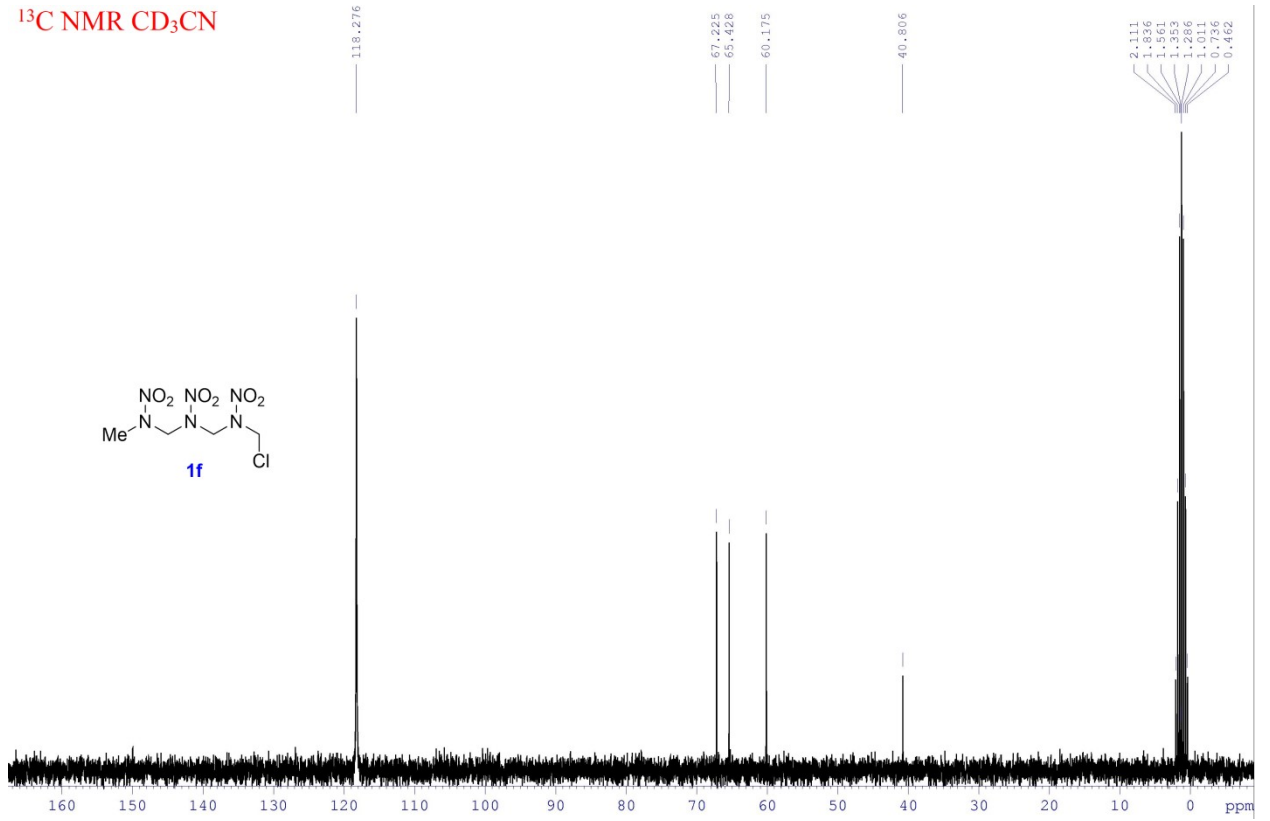

<sup>14</sup>N NMR CD<sub>3</sub>CN

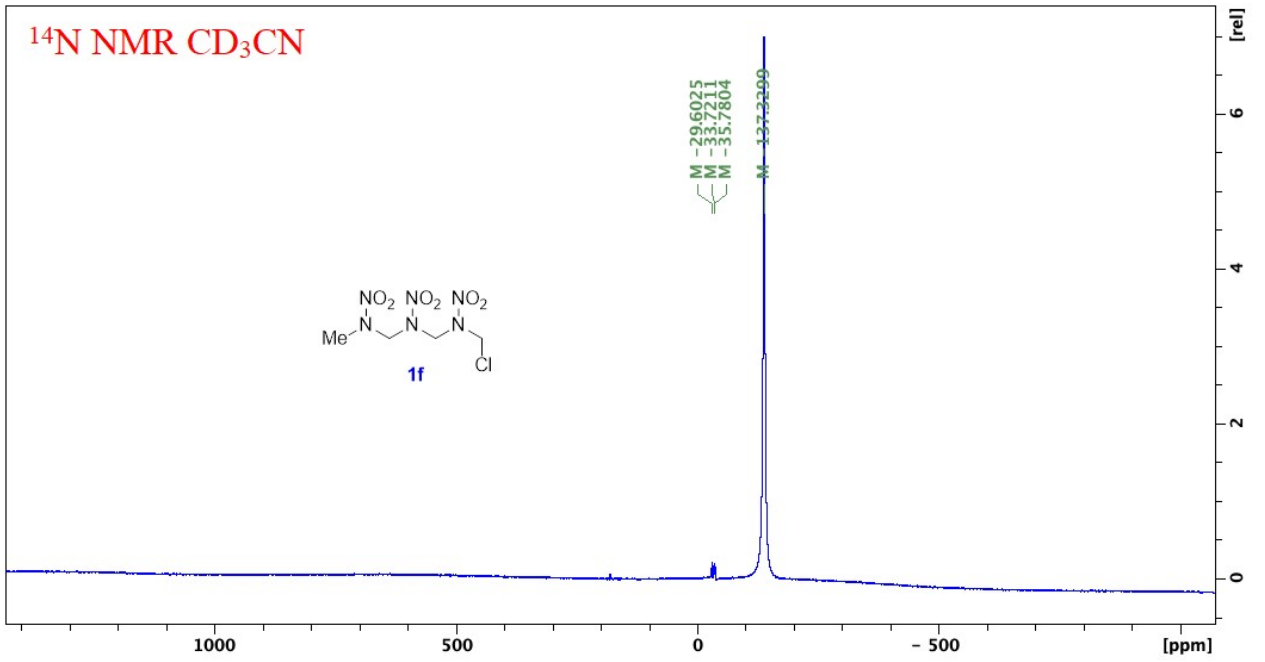





$^{14}\text{N}$  NMR  $\text{CD}_3\text{CN}$ 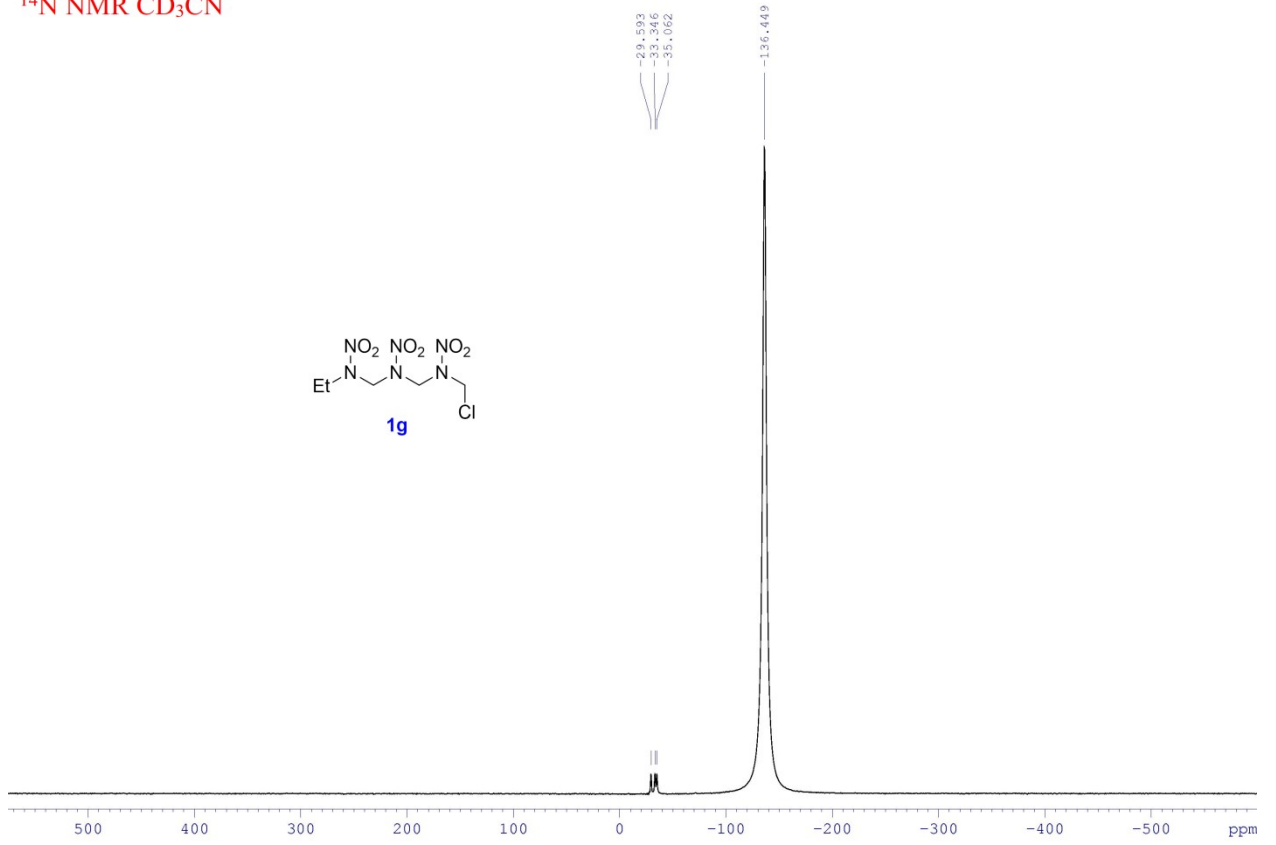 $^1\text{H}$  NMR  $\text{CD}_3\text{CN}$ 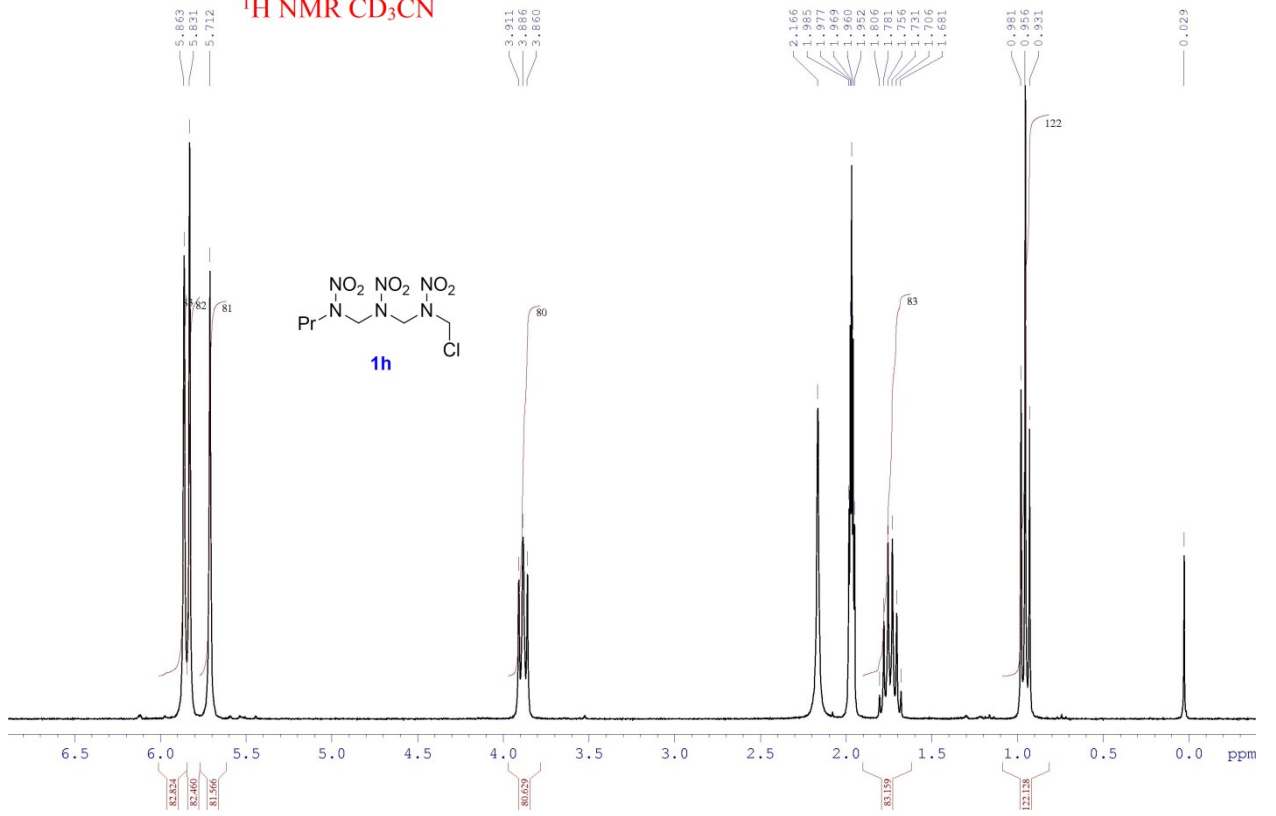

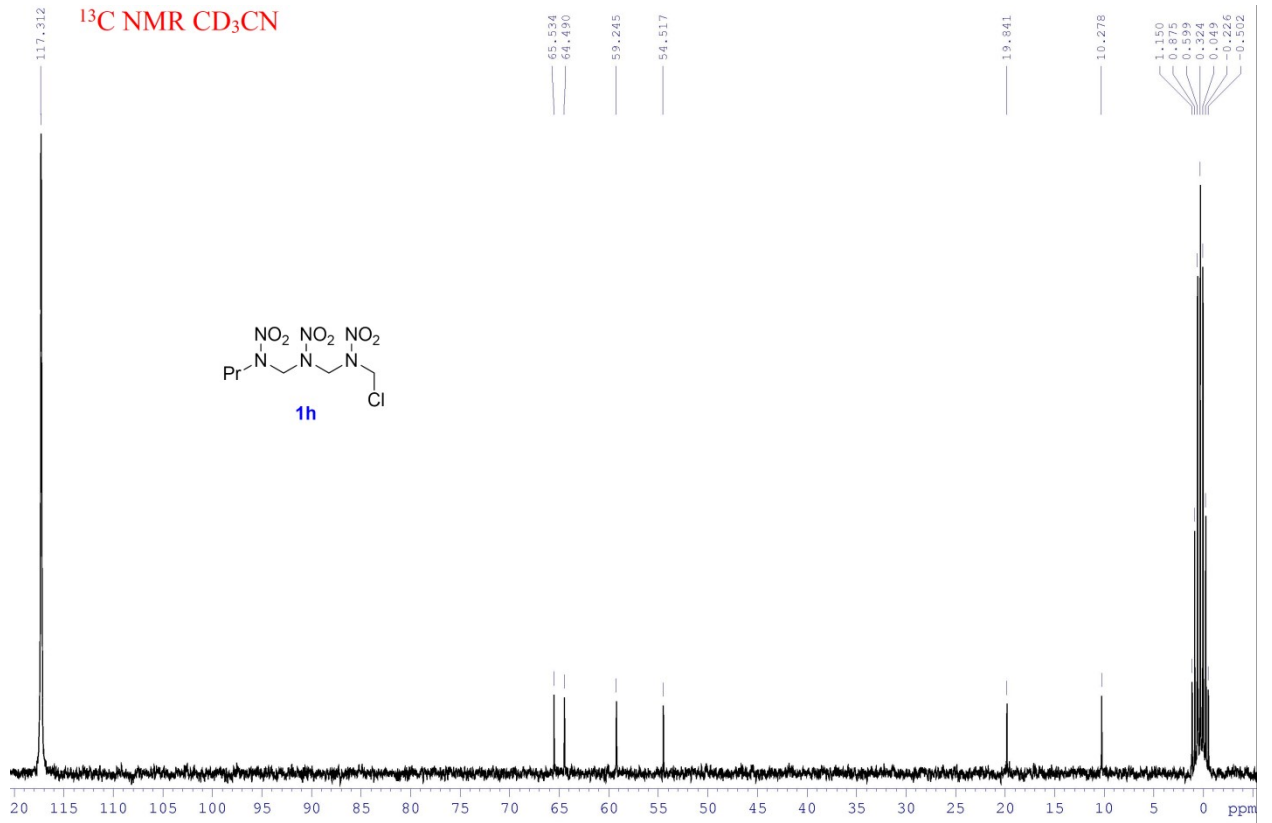

<sup>14</sup>N NMR CD<sub>3</sub>CN

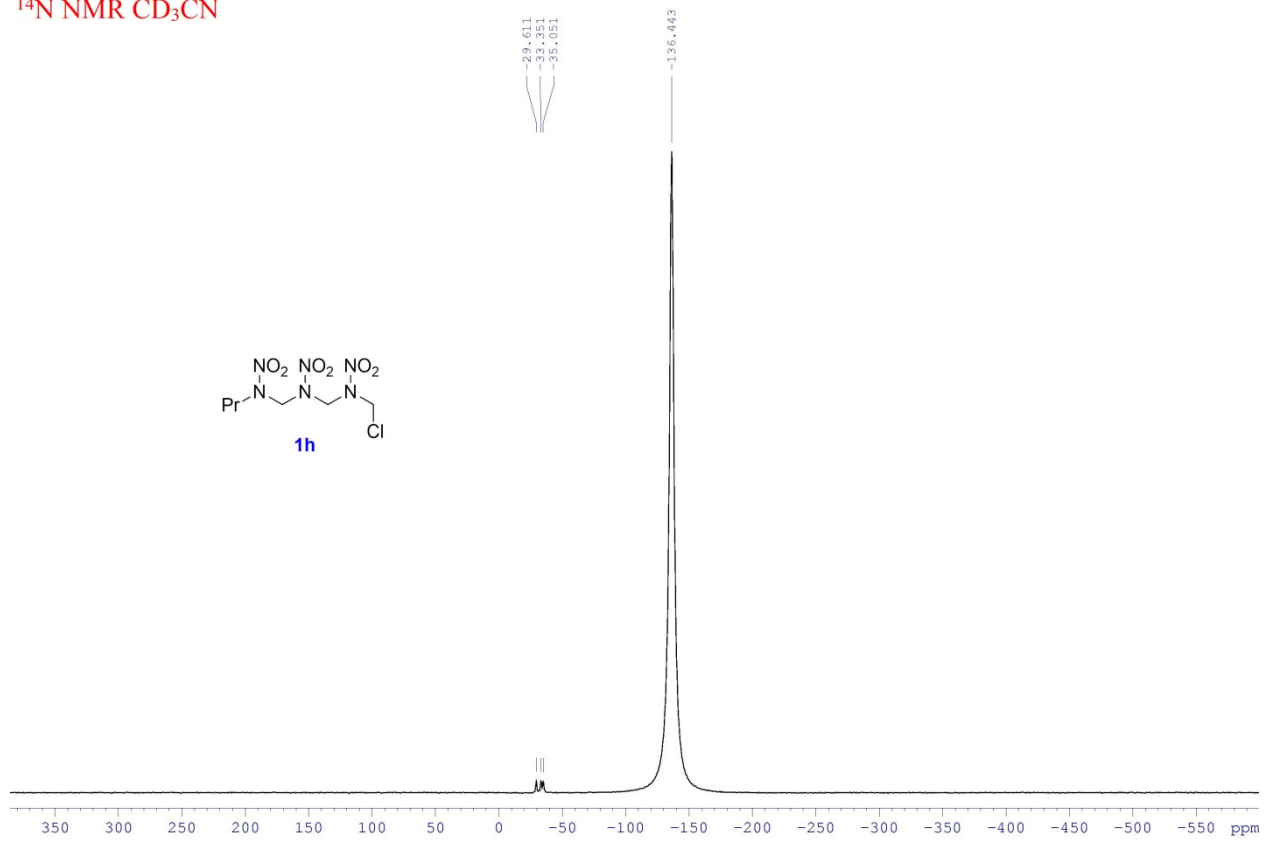

<sup>1</sup>H NMR CD<sub>3</sub>CN

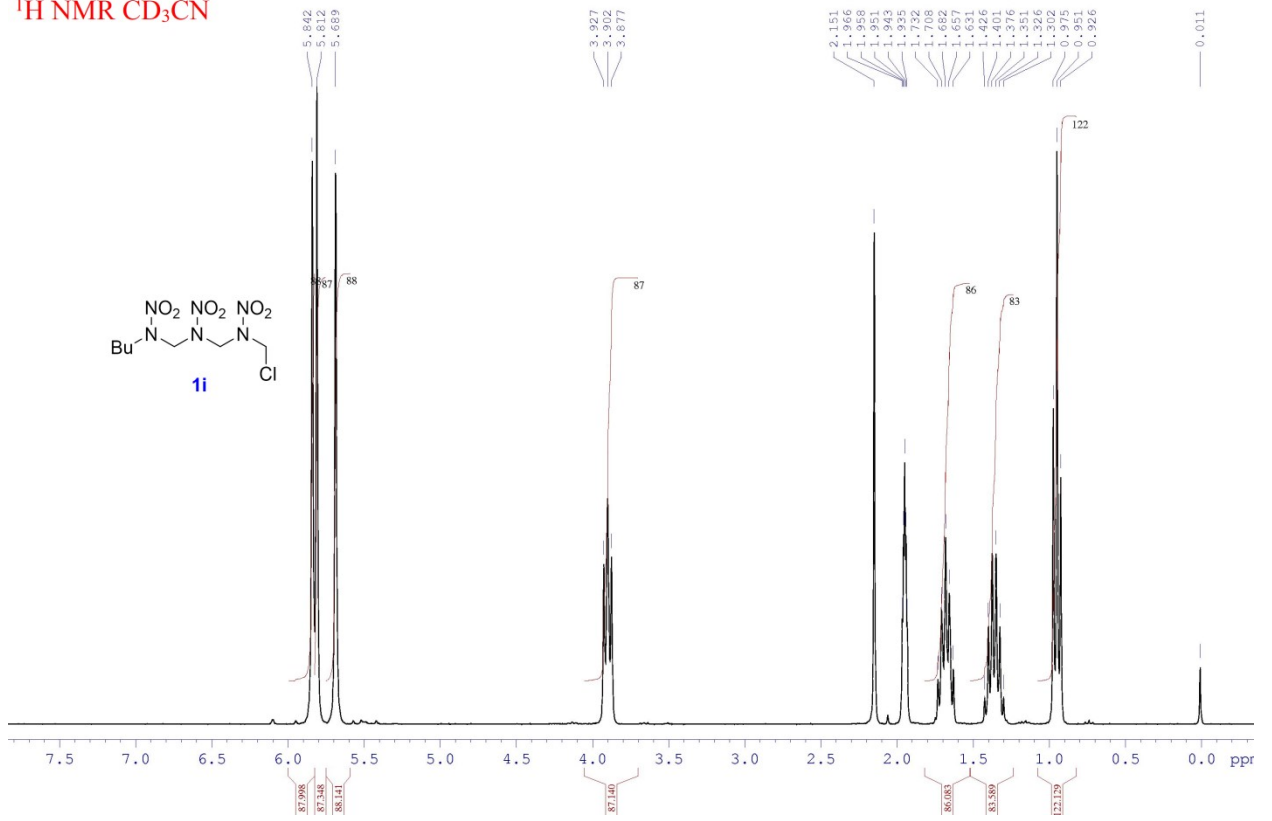

<sup>13</sup>C NMR CD<sub>3</sub>CN

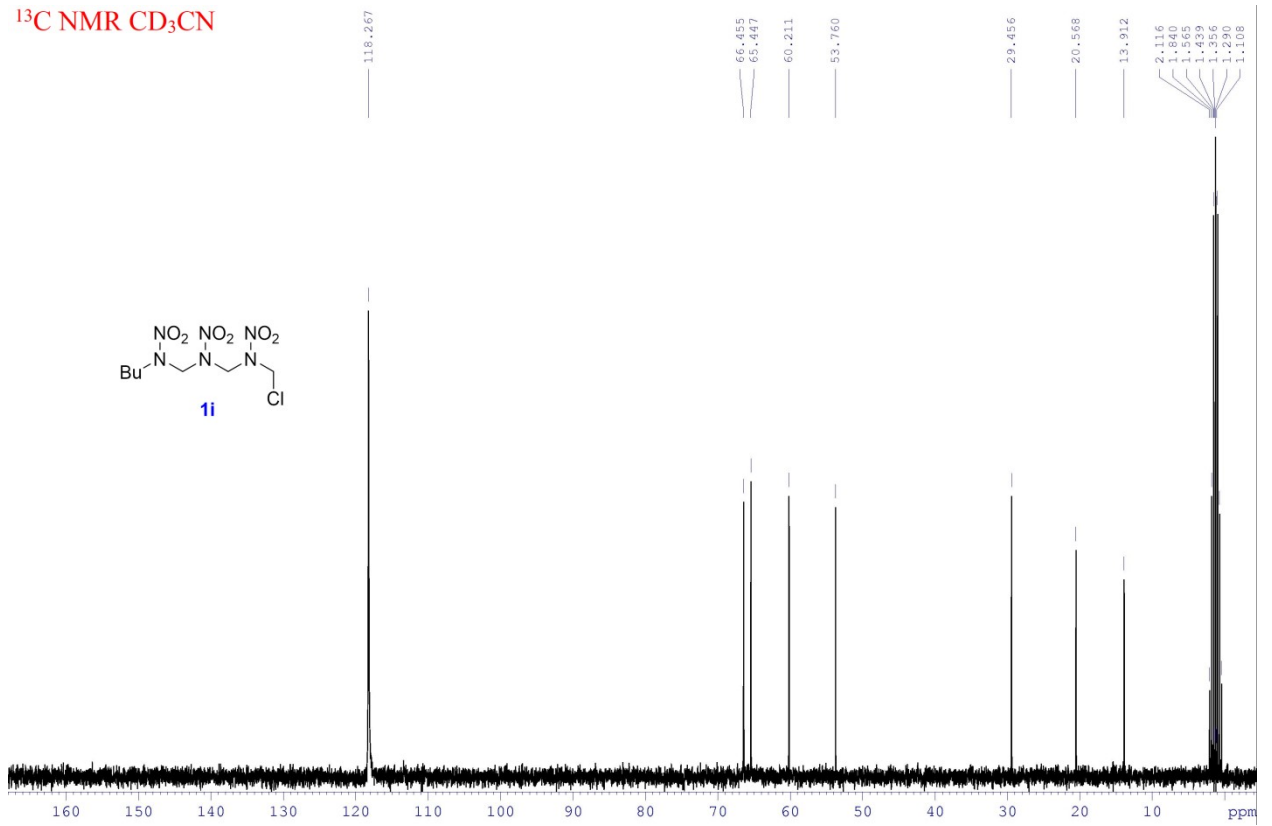

$^{14}\text{N}$  NMR  $\text{CD}_3\text{CN}$ 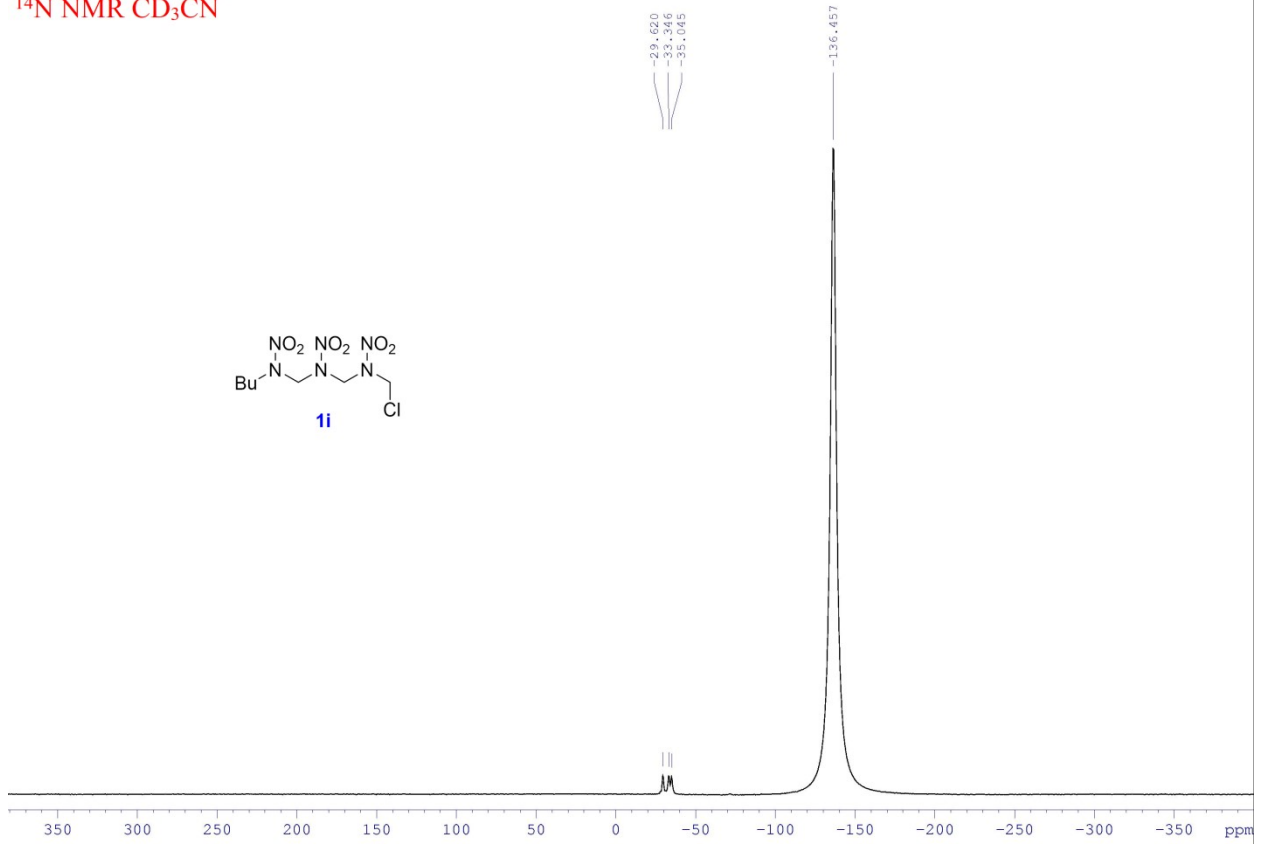 $^1\text{H}$  NMR  $\text{CD}_3\text{CN}$ 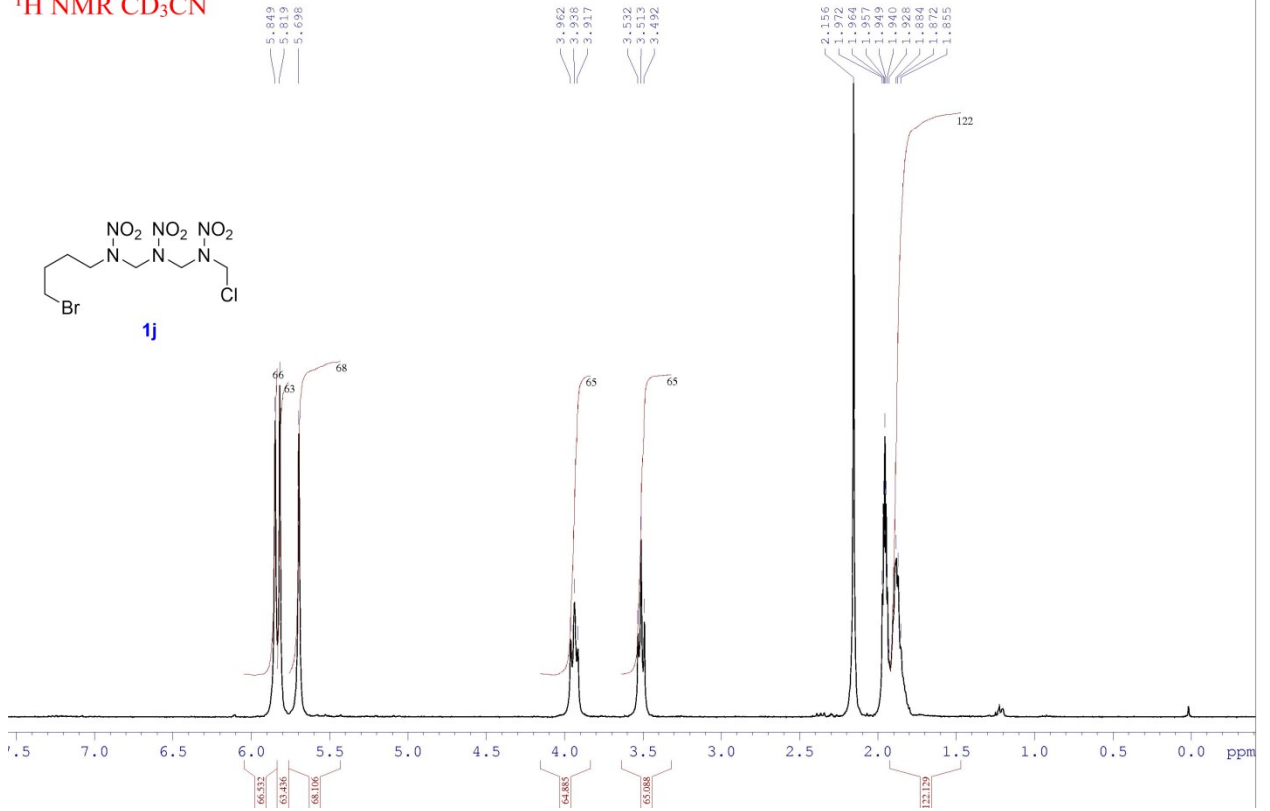

$^{13}\text{C}$  NMR  $\text{CD}_3\text{CN}$ 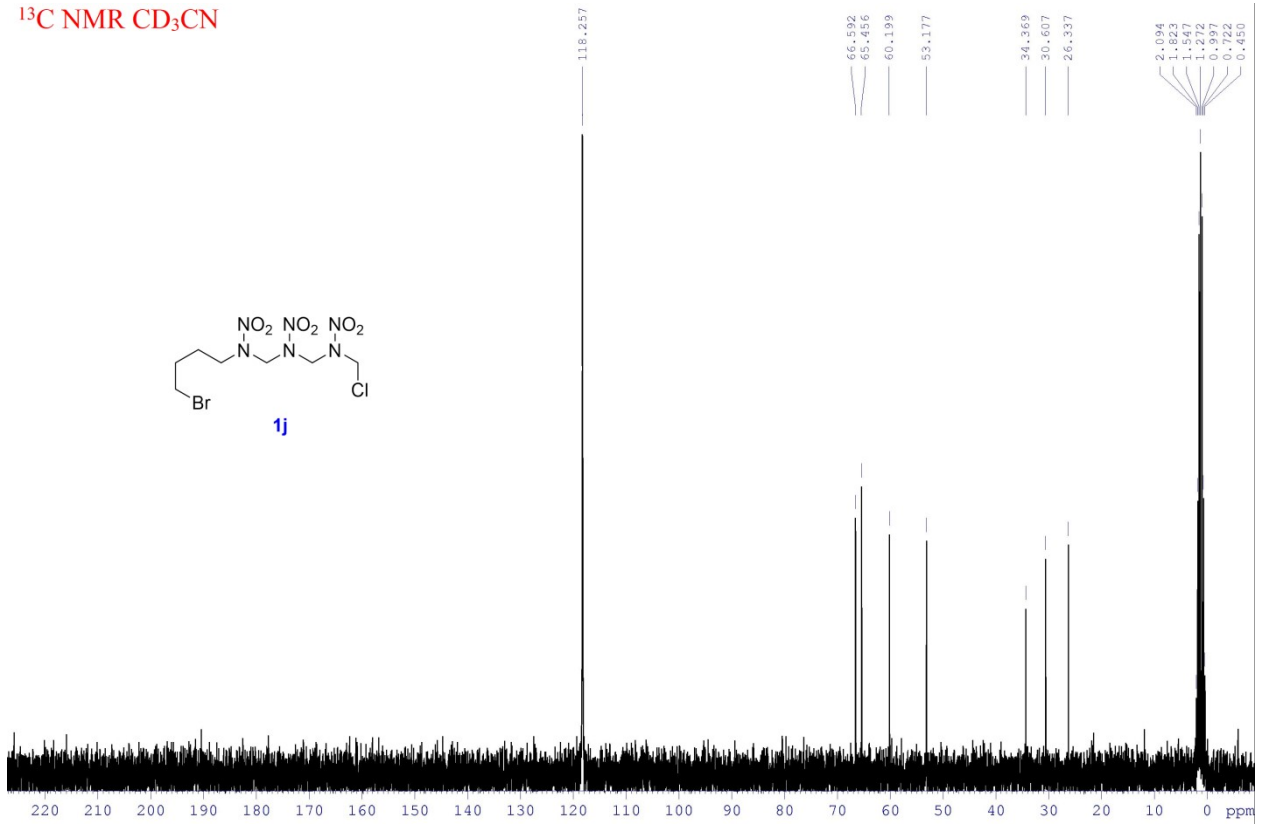 $^{14}\text{N}$  NMR  $\text{CD}_3\text{CN}$ 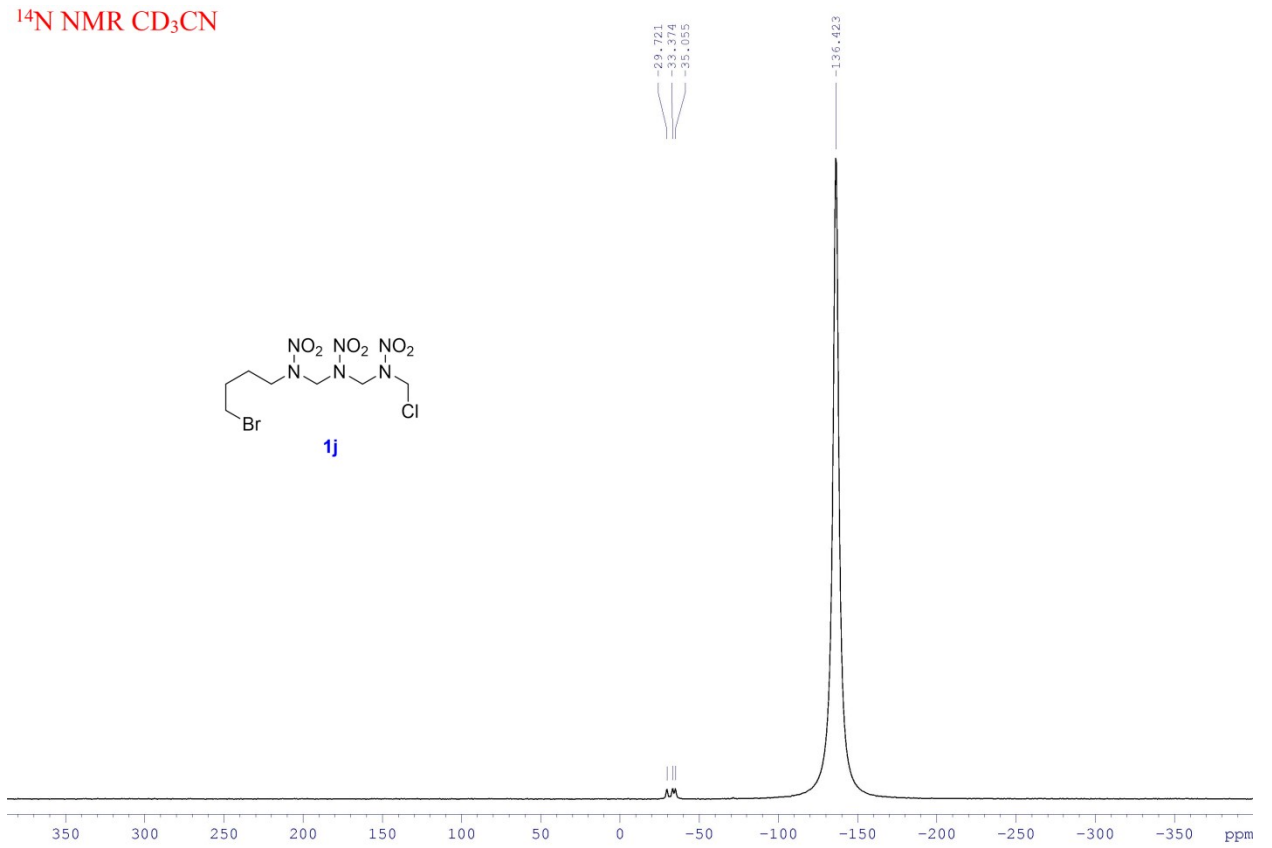

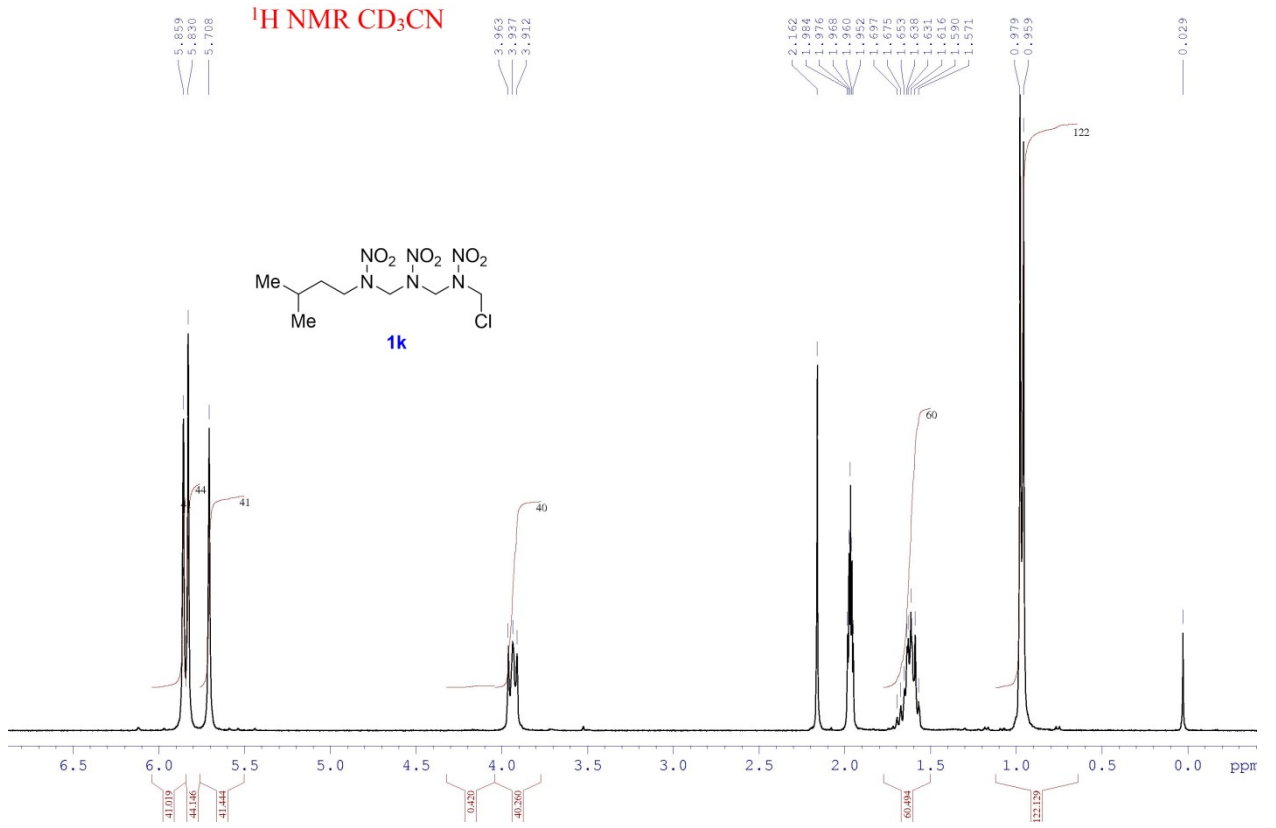

**<sup>13</sup>C NMR CD<sub>3</sub>CN**

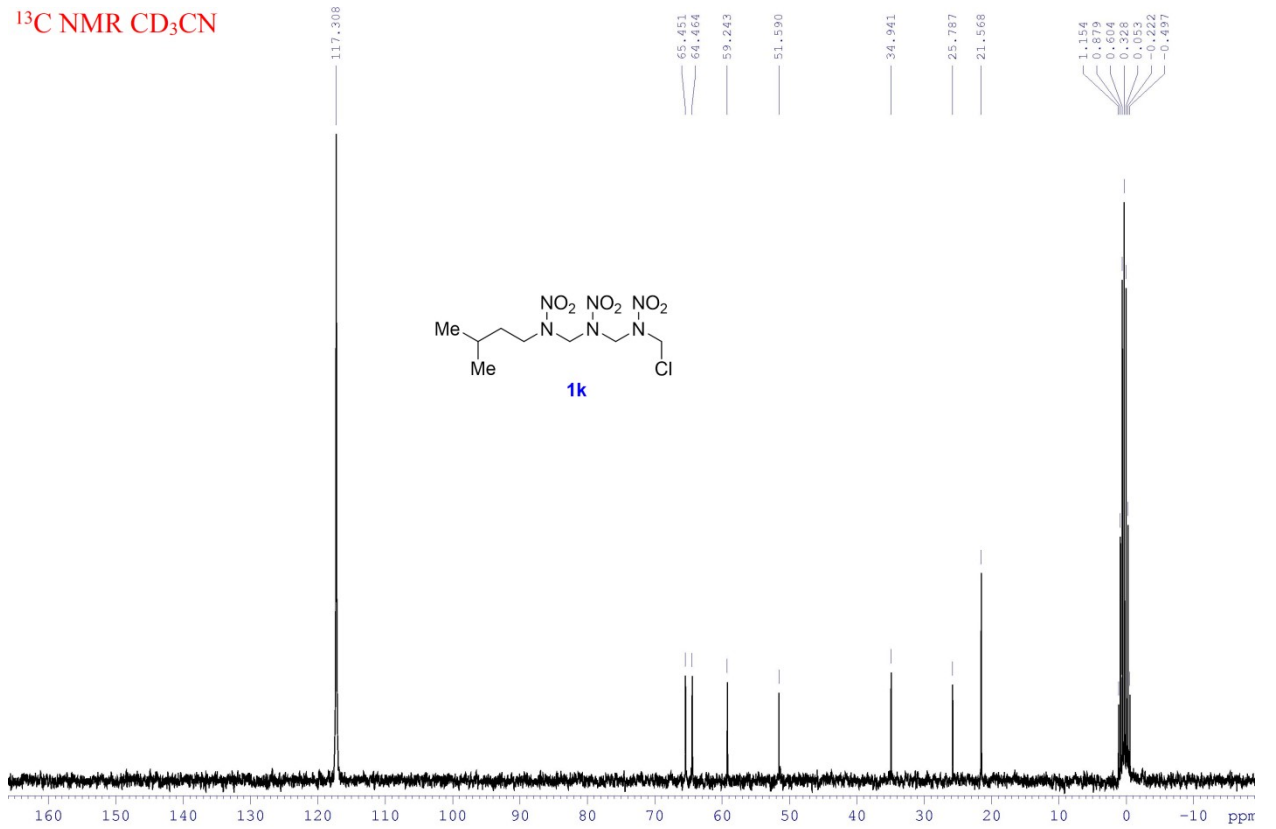

<sup>14</sup>N NMR CD<sub>3</sub>CN

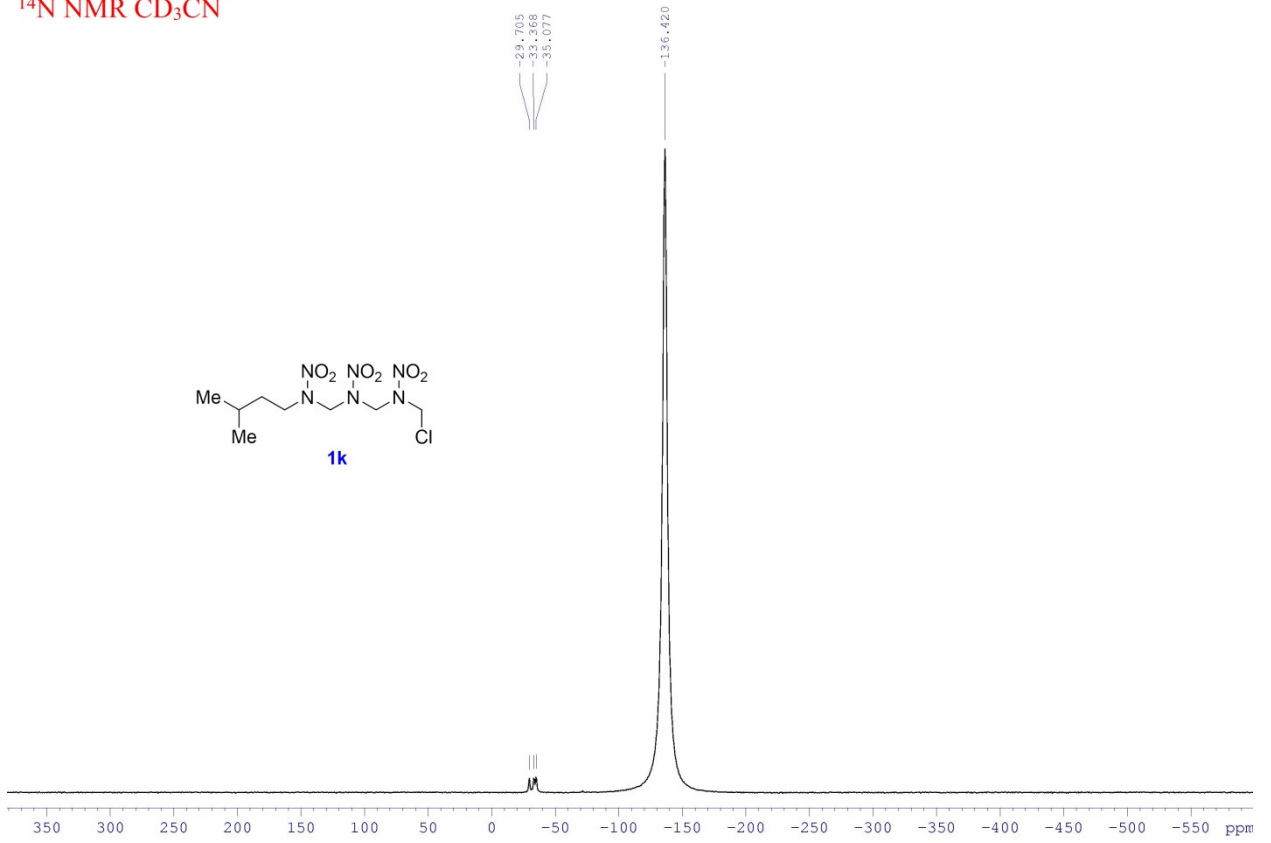

<sup>1</sup>H NMR CD<sub>3</sub>CN

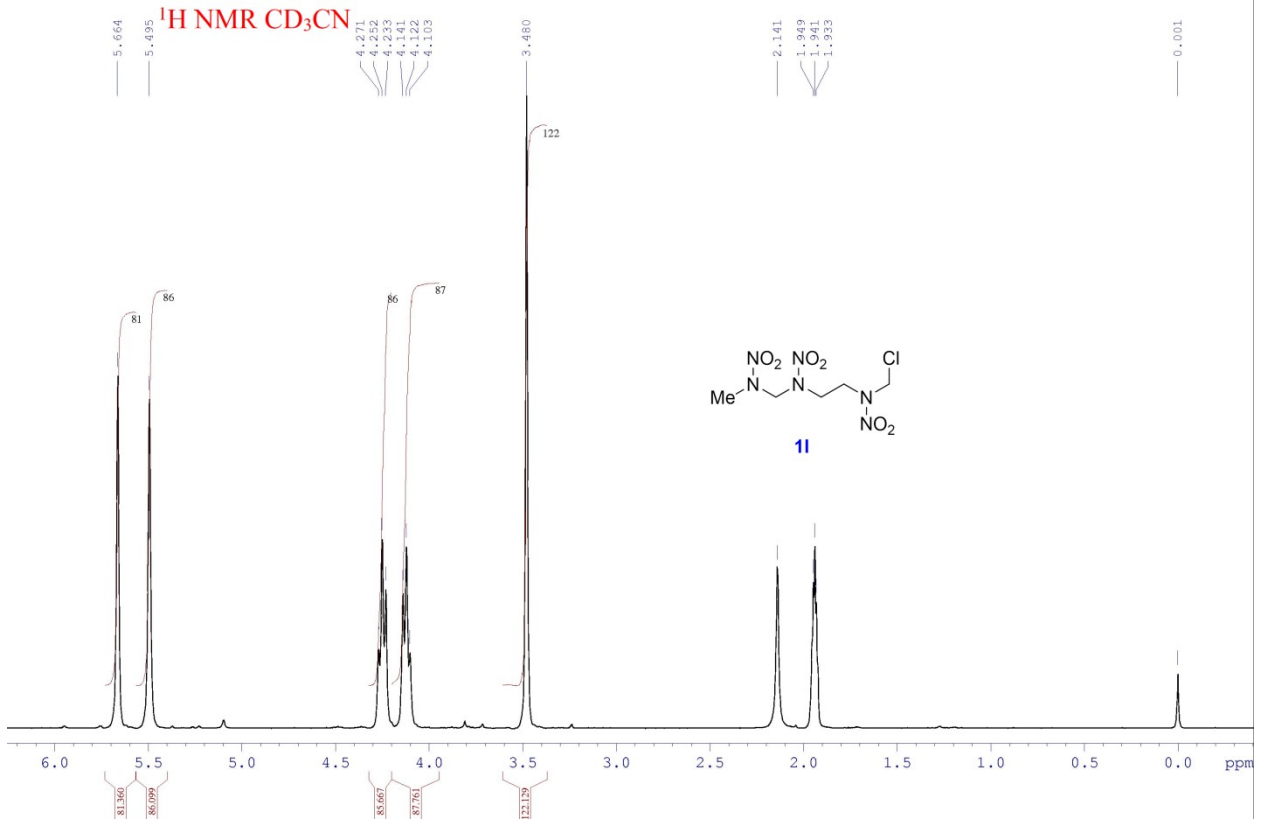



$^{13}\text{C}$  NMR  $\text{CD}_3\text{CN}$ 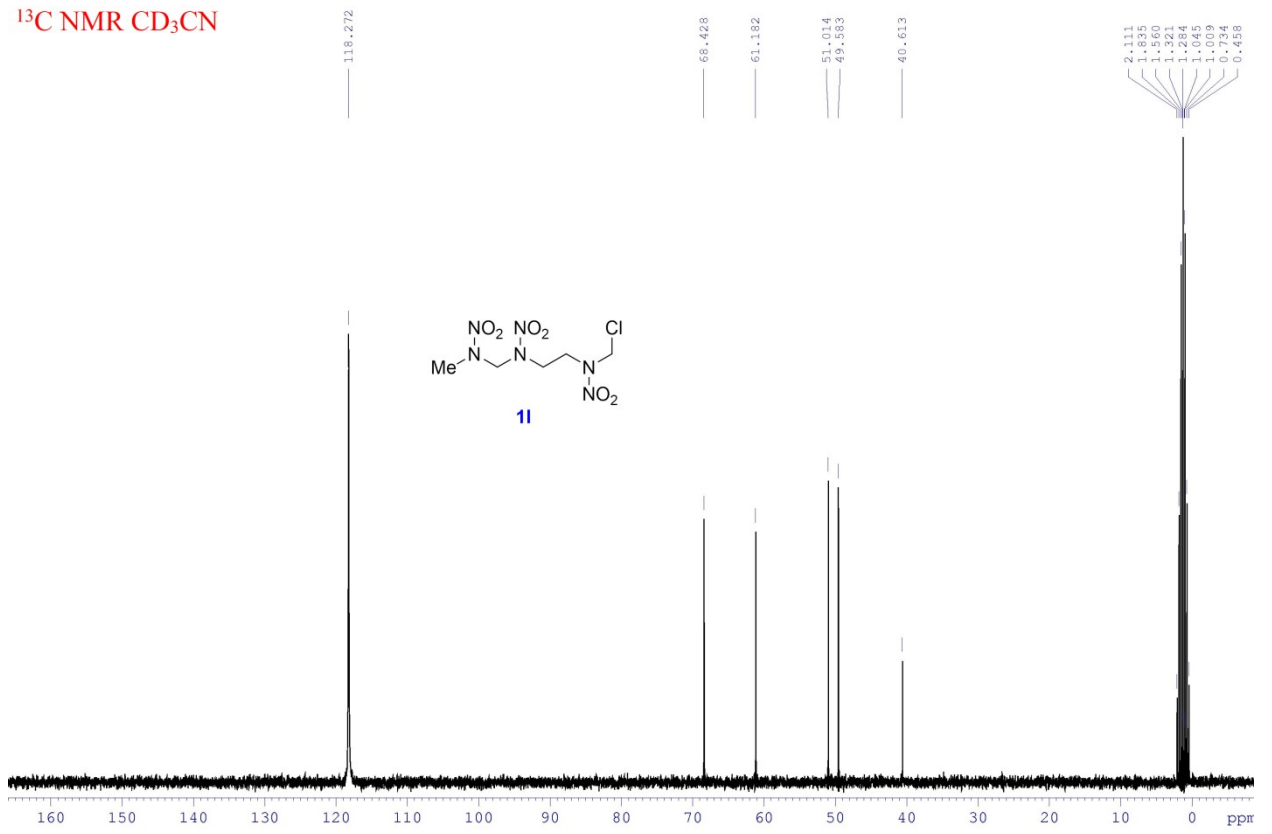 $^{14}\text{N}$  NMR  $\text{CD}_3\text{CN}$ 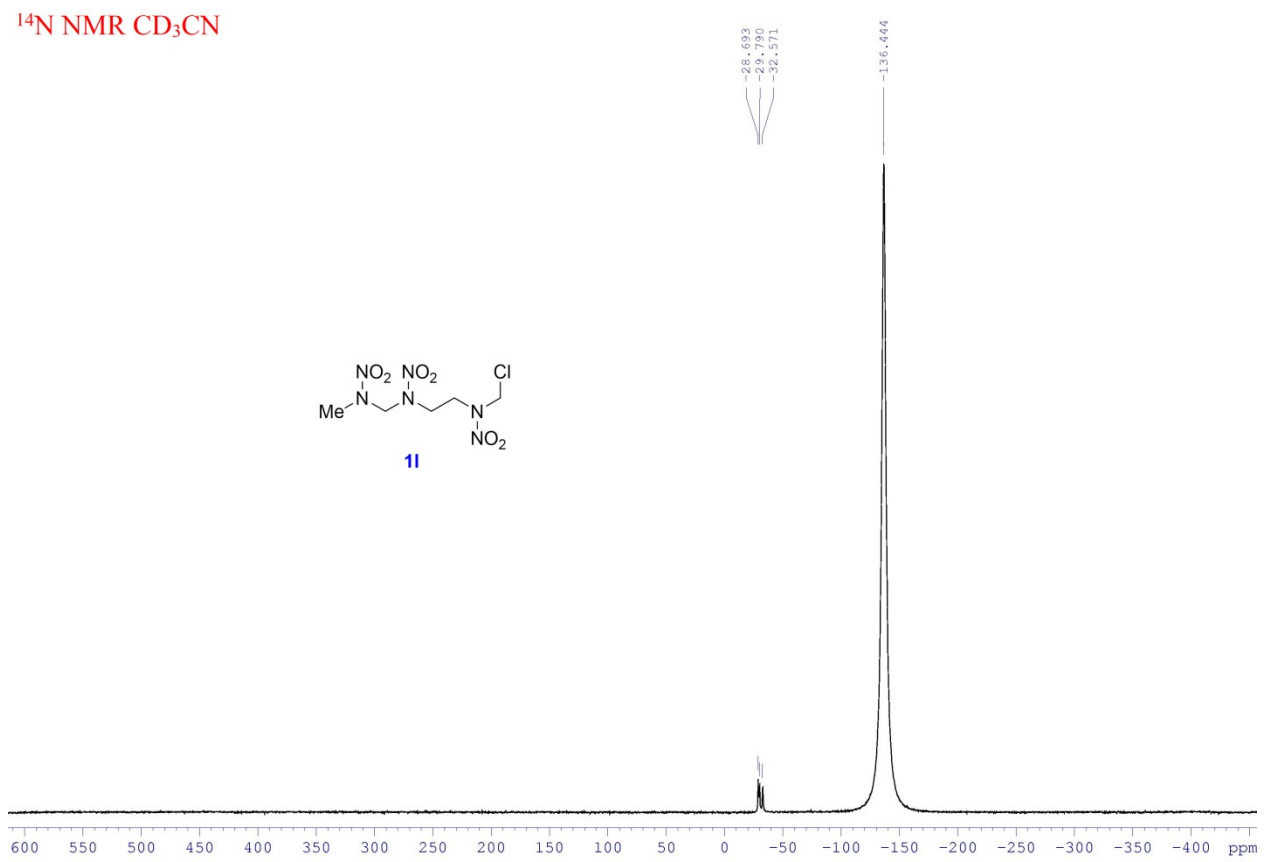



$^{14}\text{N}$  NMR  $\text{CD}_3\text{CN}$ 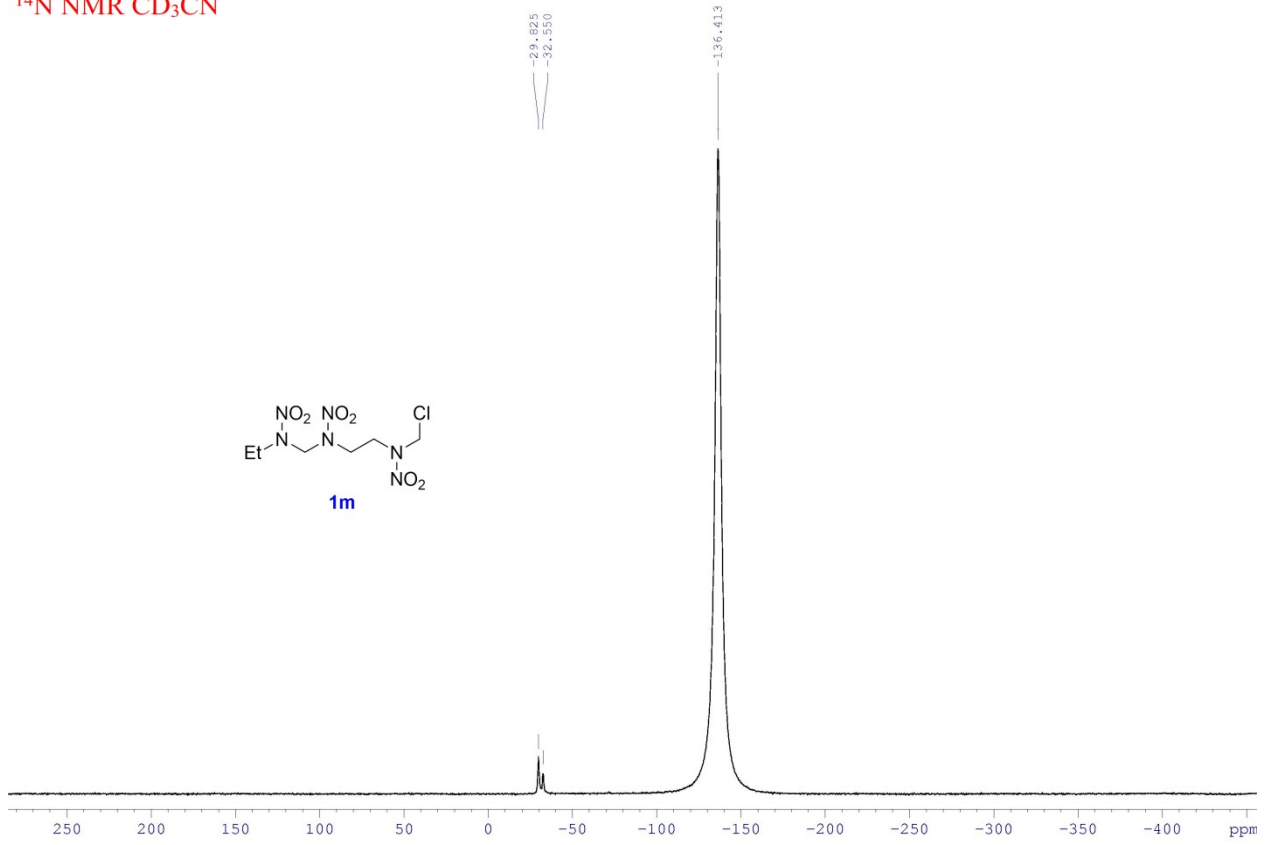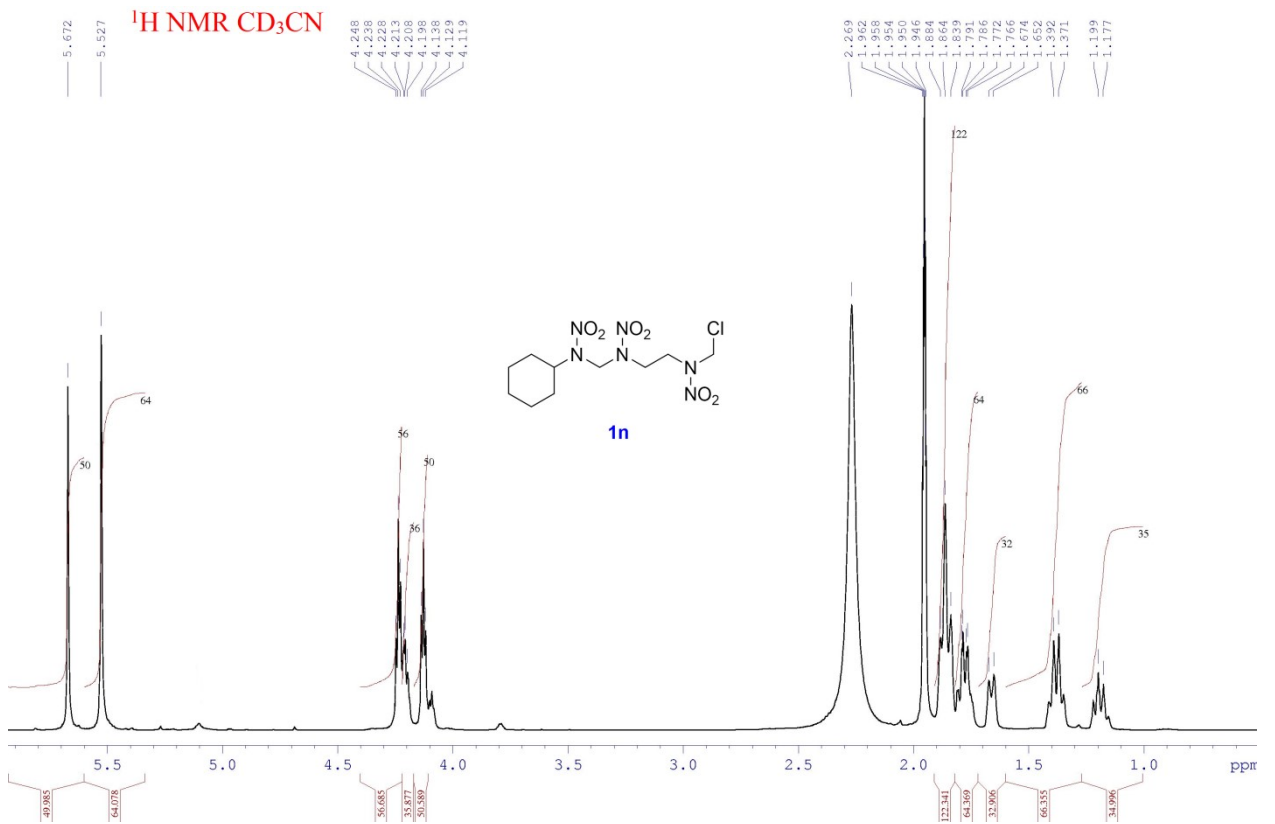

$^{13}\text{C}$  NMR  $\text{CD}_3\text{CN}$ 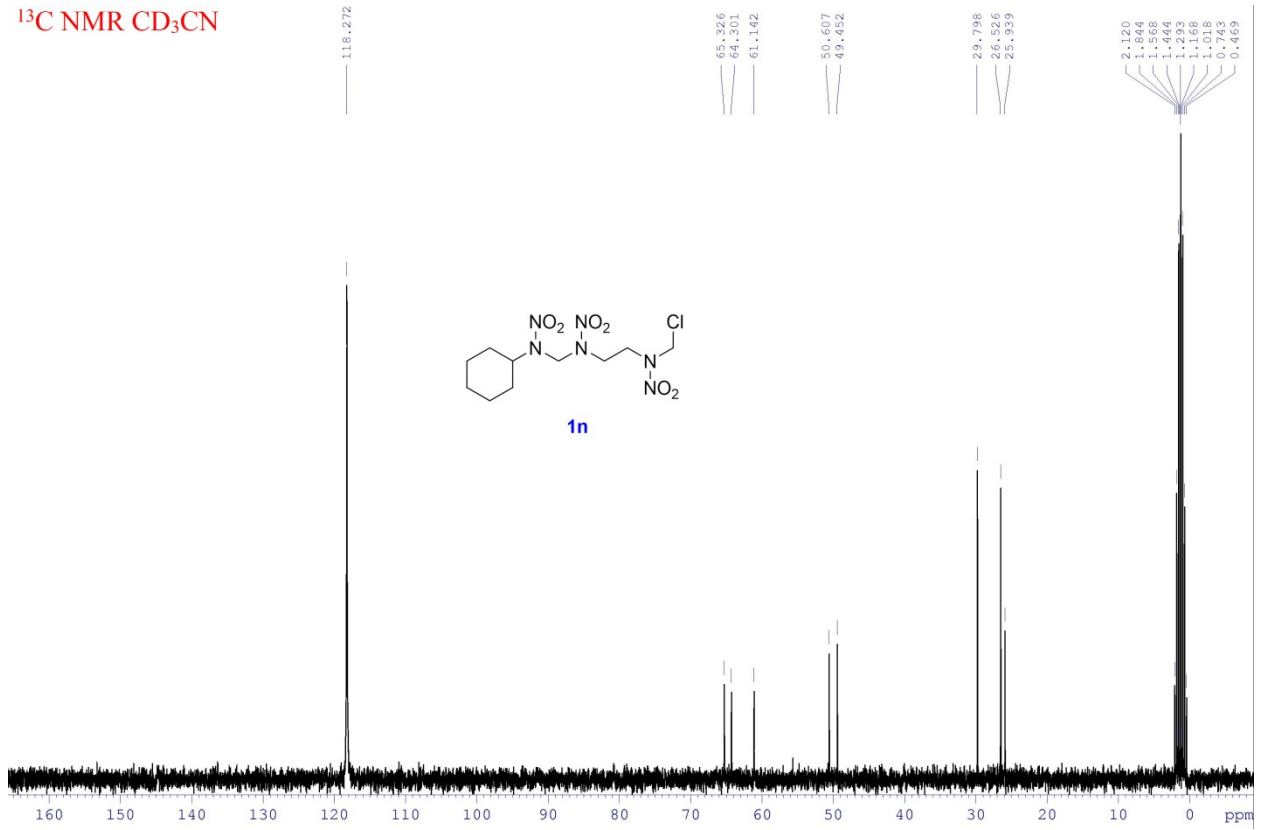 $^{14}\text{N}$  NMR  $\text{CD}_3\text{CN}$ 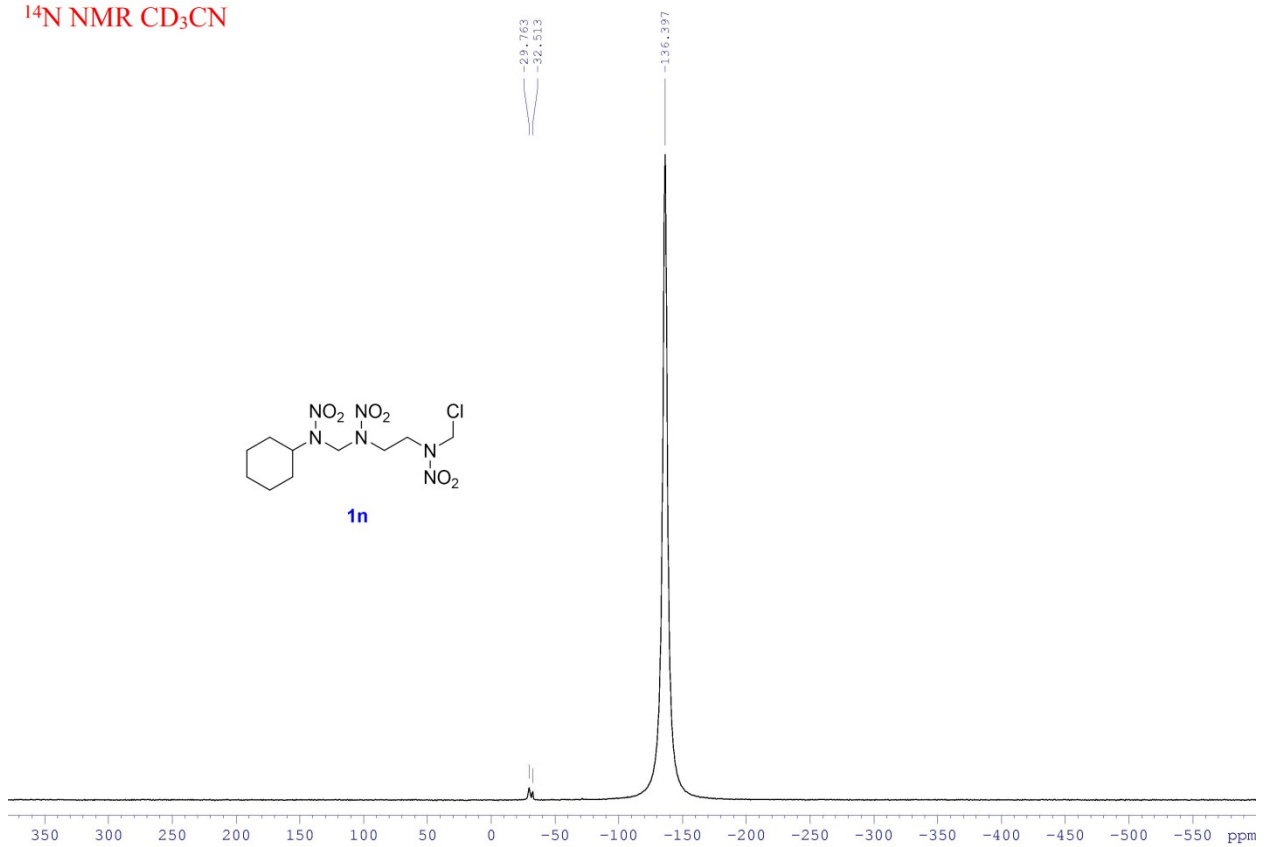

$^1\text{H NMR CD}_3\text{CN}$ 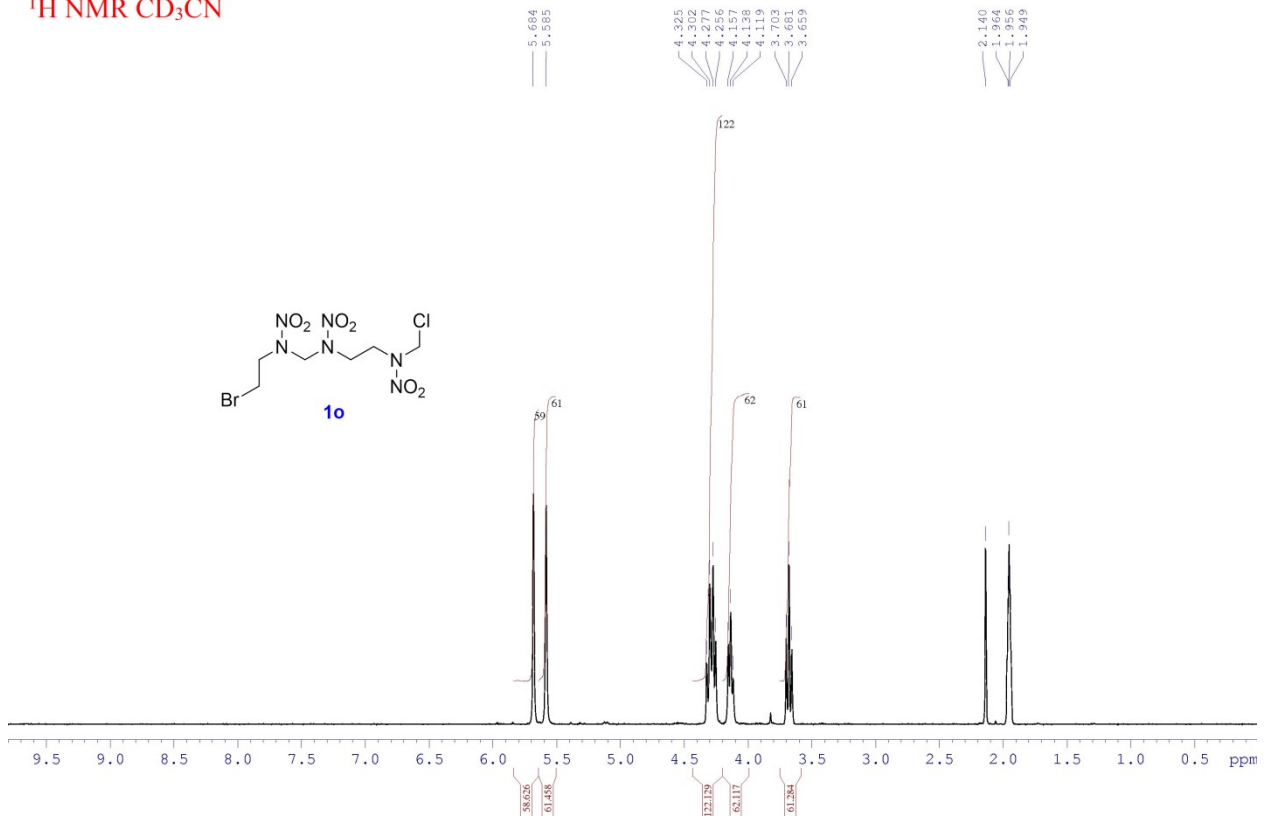 $^{13}\text{C NMR CD}_3\text{CN}$ 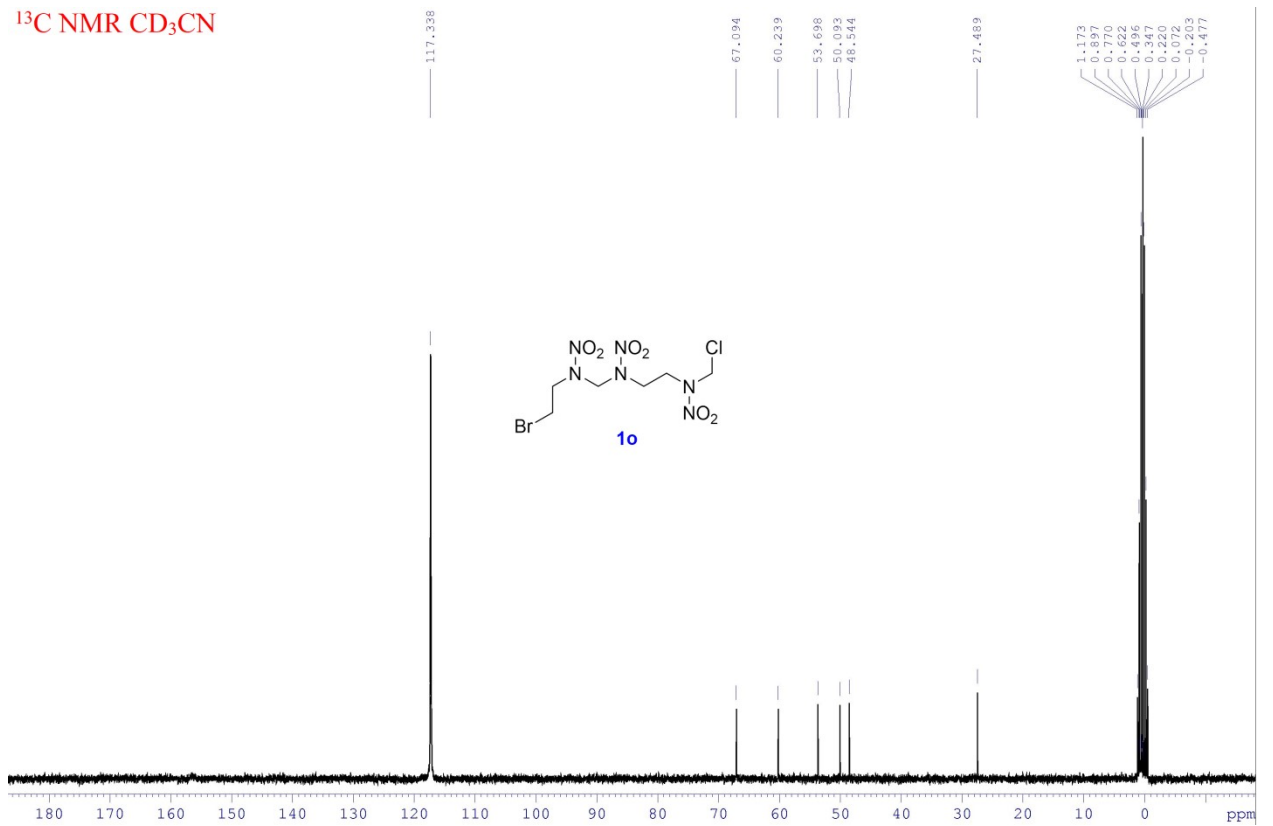









$^{14}\text{N}$  NMR  $\text{CD}_3\text{CN}$ 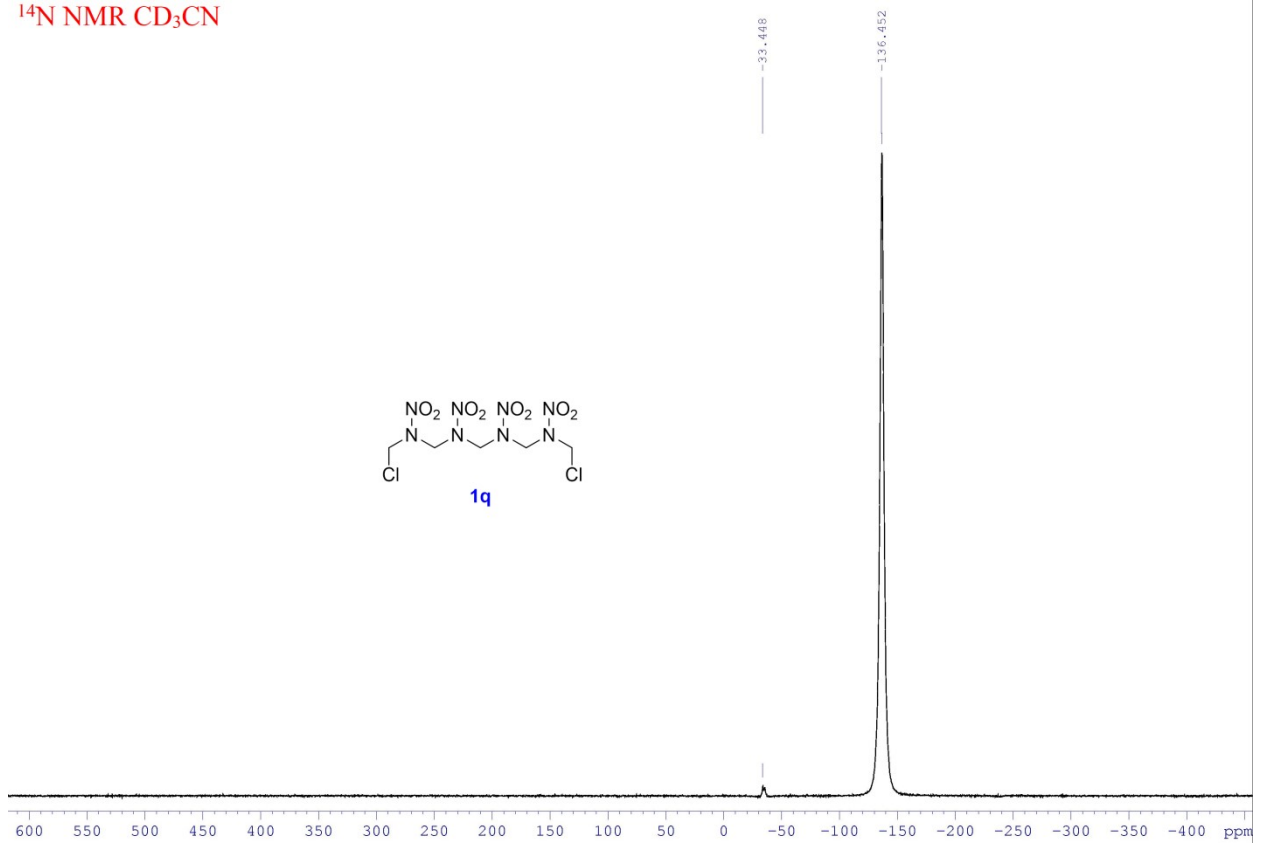 $^1\text{H}$  NMR  $\text{CDCl}_3$ 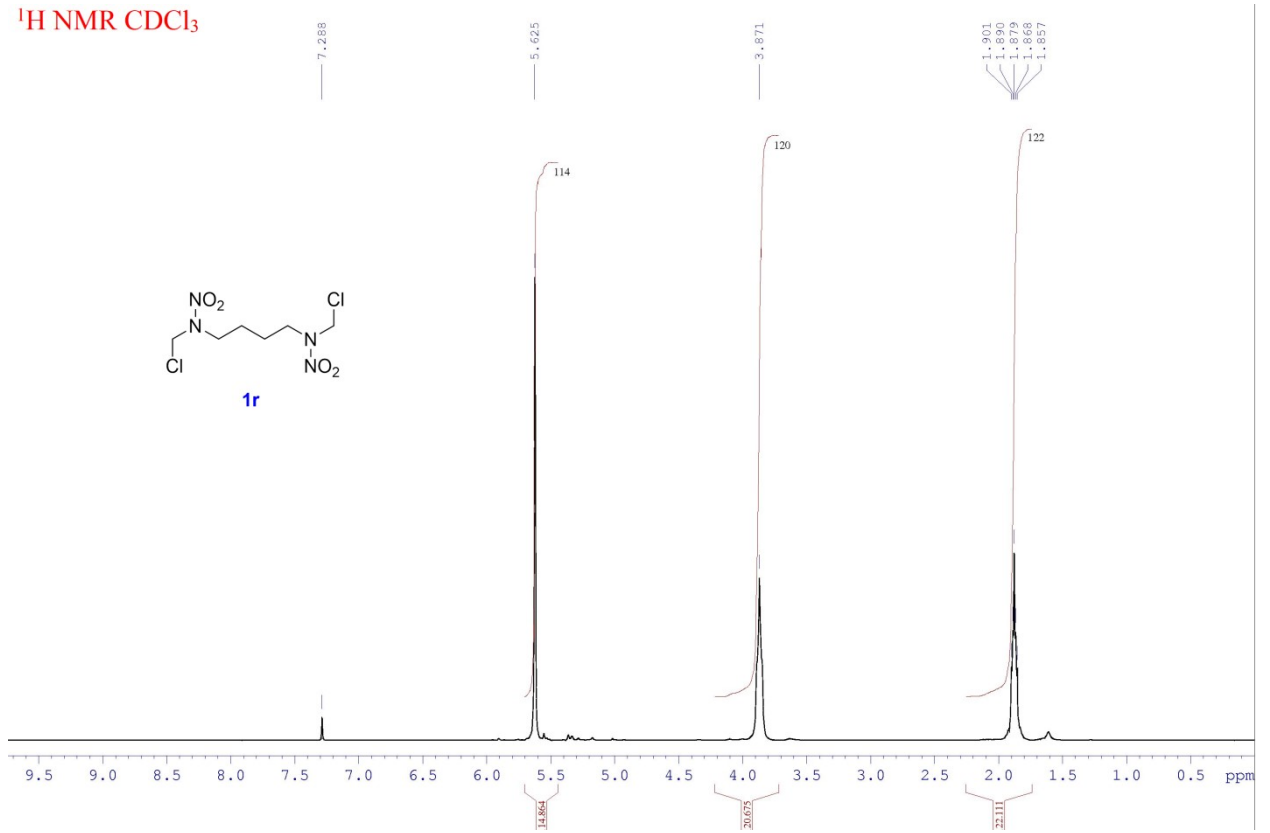

$^{13}\text{C}$  NMR  $\text{CDCl}_3$ 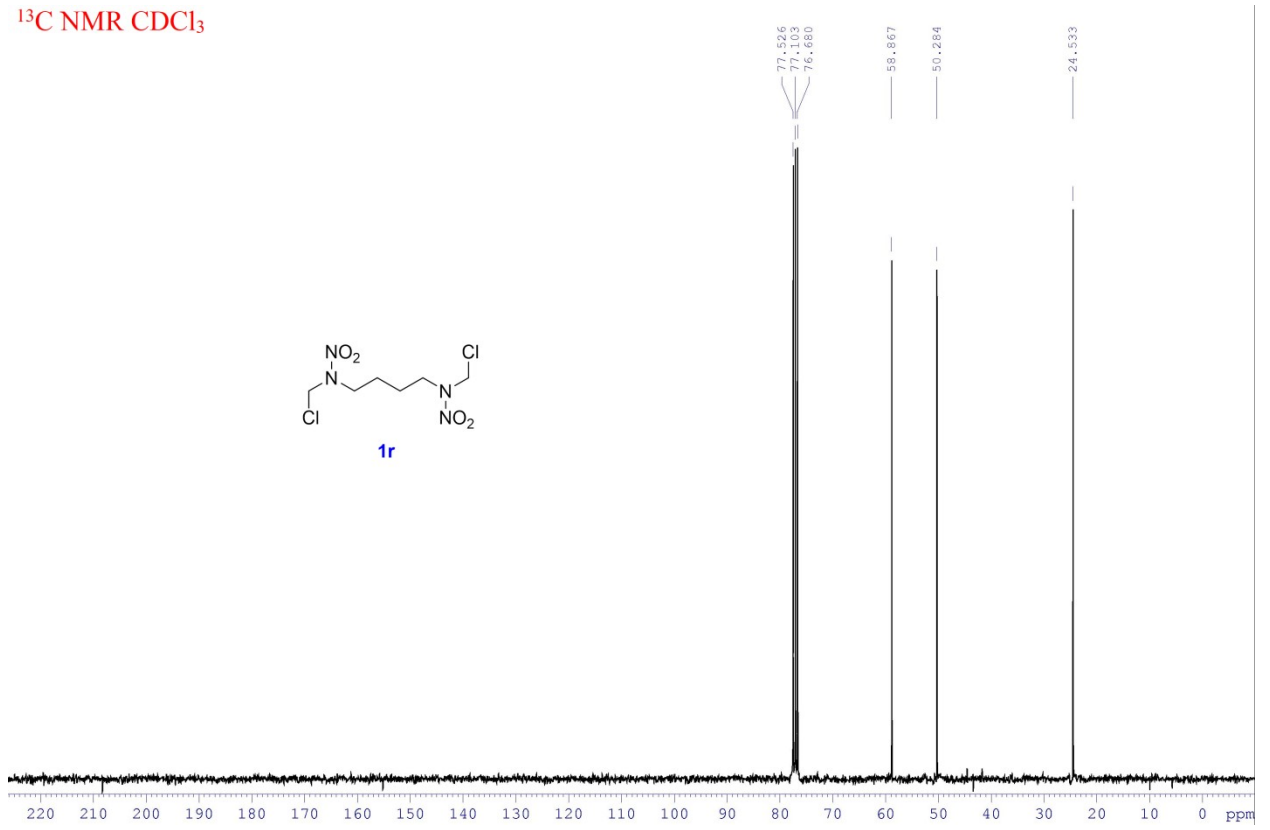 $^{14}\text{N}$  NMR  $\text{CDCl}_3$ 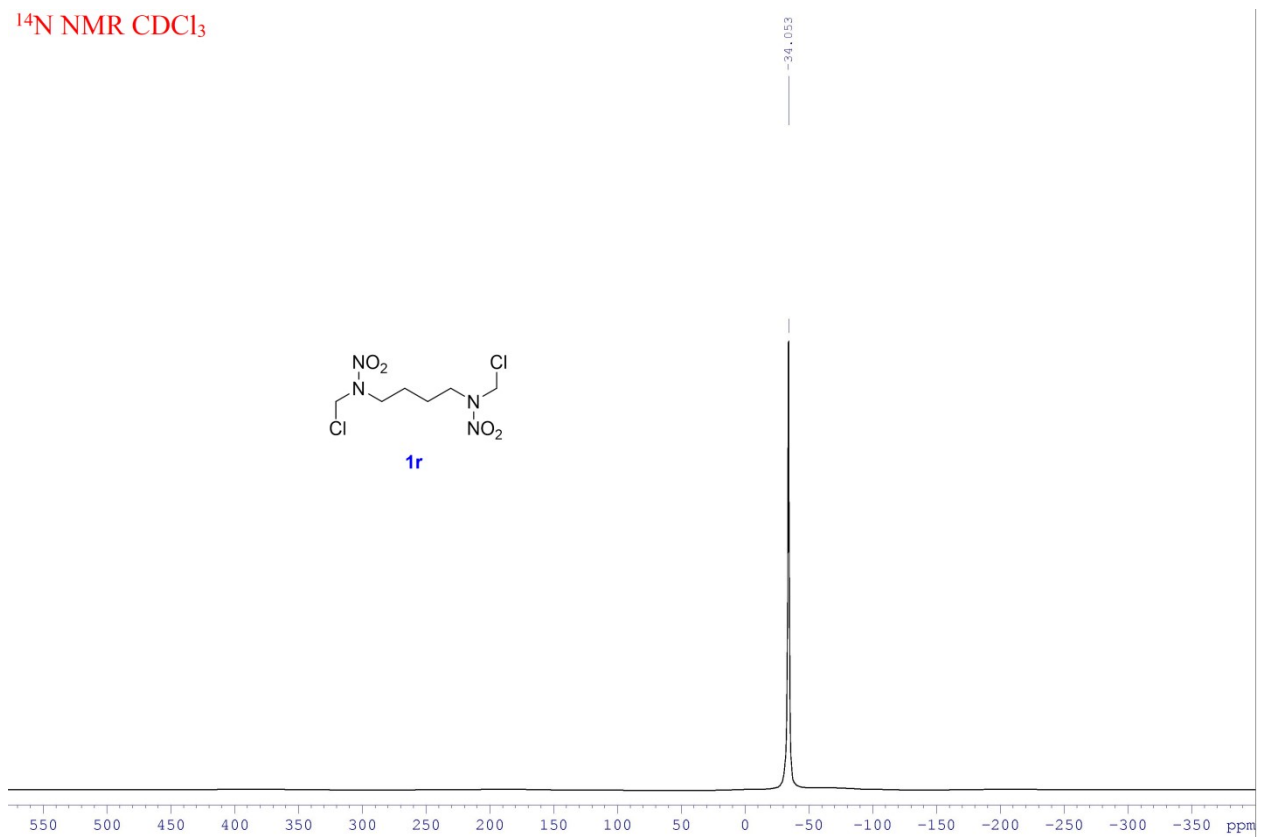

Supplement: d2nj03521a5.pdf [file d2nj03521a5.pdf]
