# Supplementary figures and images for: Efficient synthesis of N-(chloromethyl)nitramines via TiCl4-catalyzed chlorodeacetoxylation
Source: Royal Society of Chemistry journal article supplement (doi:10.1039/d2nj03521a), 2022-01-01

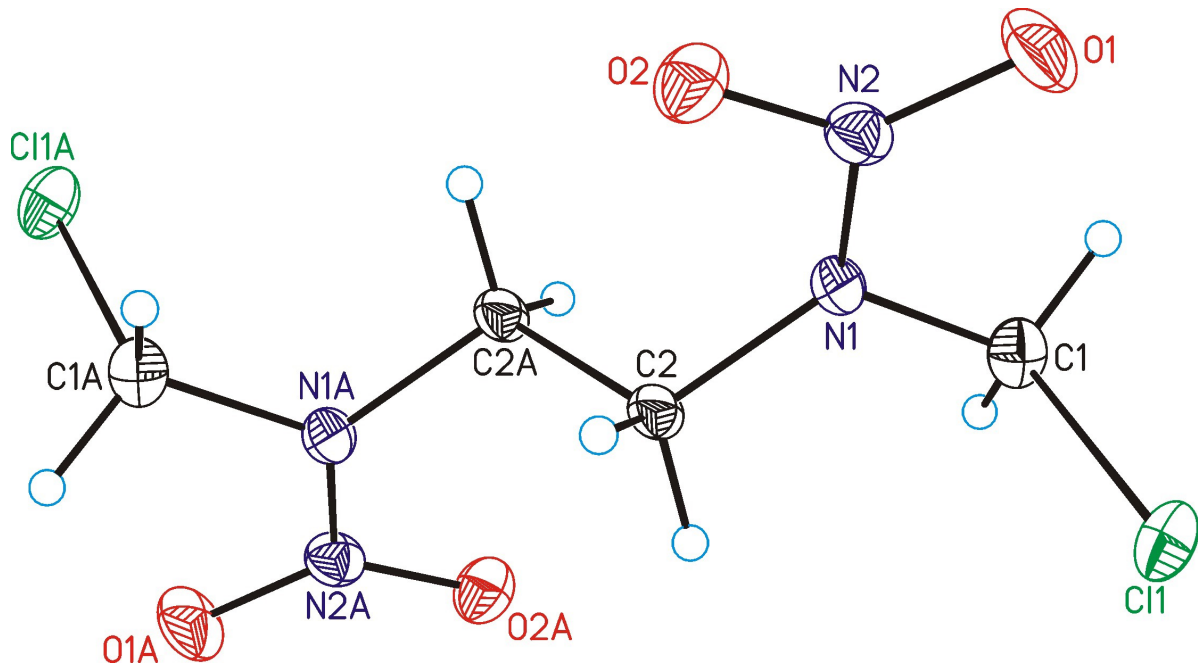

Supplement: d2nj03521a1.pdf [file d2nj03521a1.pdf]

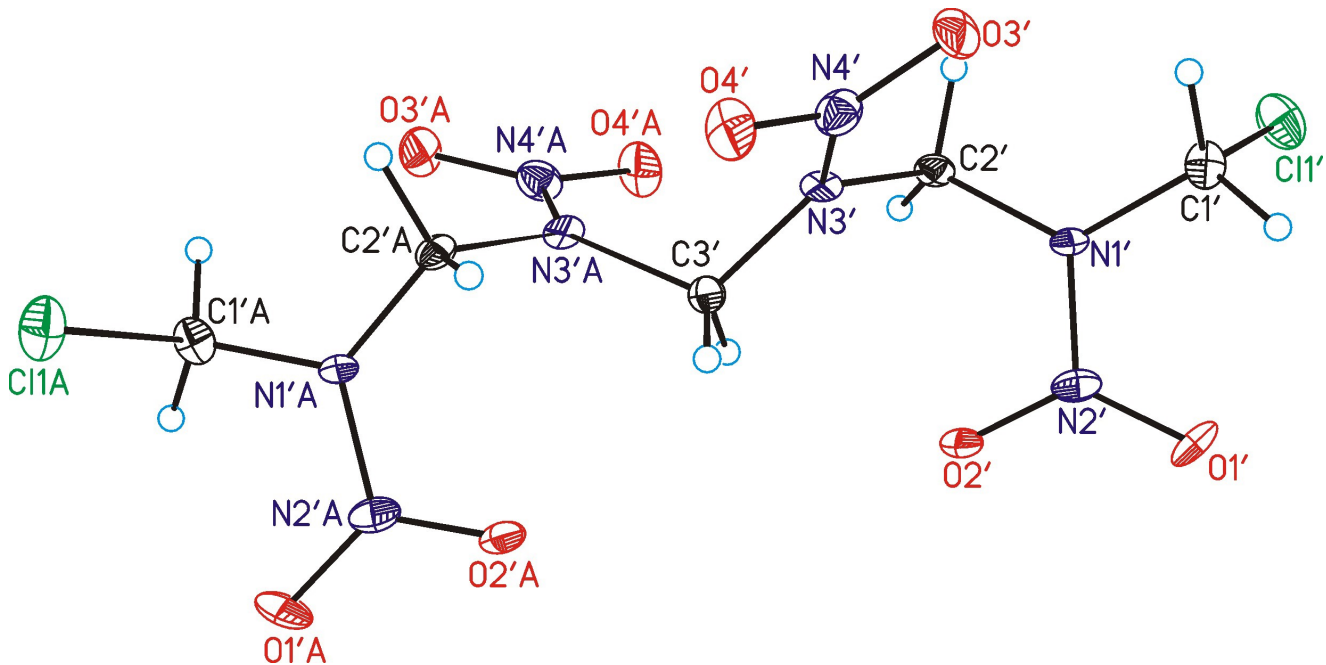

Supplement: d2nj03521a2.pdf [file d2nj03521a2.pdf]
